# Supplementary material
Source: JCI journal article supplement (doi:10.1172/jci184240)
Supplement: sd1 [file 1]

## Supplemental Methods

### *Human peripheral blood mononuclear cells (PBMCs)*

PBMCs were isolated as described (1). Cryorecovered cells were rested at 37°C for 3 hours, then resuspended in 3 mL warm lymphocyte medium (RPMI-1640 (Invitrogen 11875-093), 3% heat-inactivated FBS (Life Tech/Gibco, #10437-028), 1% sodium pyruvate (Sigma, #S8636), 1% non-essential amino acids (NEAA) (Sigma, #M7145-100ml), 100 U/mL penicillin + 100 ug/mL streptomycin (Gibco, #15140-122), and 25 µM β-mercaptoethanol (BME; Gibco, #21985023)) containing 10 ng/mL human IL-7 (Peprotech 200-07). Cells were incubated for 72 hours before subsequent analysis.

### *Mice and demyelination models*

C57BL/6 wild-type (WT; B6; Stock No. 000664), B6.PL-Thy1/CyJ (Thy1.1; Stock No. 000406), and C57BL/6-Tg(TcraTcrb)1100Mjb/J (OTI, stock # 003831) mice were obtained from the Jackson Laboratories (Bar Harbor, ME). Mice were fed cuprizone diet starting at 10 weeks of age, as described (2). Experimental autoimmune encephalomyelitis (EAE) was induced in female B6 mice at 11-13 weeks of age, as described (2). Mice used for splenocytes ranged from 8-20 weeks of age. All mice were group housed under controlled temperature and humidity with a 12-h light/dark cycle. Mice were provided ad libitum access to food and water.

### *Intracerebral AAV injection*

Anesthetized adult mice (>10 weeks of age) were injected with 1.5 µL PBS containing  $3 \times 10^9$  gene copies of AAV1.Syn.OVA.GFP (2) at a rate of 0.5 µL/min using a 600 series 5 µL Hamilton syringe (No. 7633-01) and a Quintessential Stereotactic Injector (QSI) pump (cat #53311). Virus was delivered 1.0 mm left of Bregma at a depth of 1.0 mm below the surface of the brain. The needle was held in place for 5 min following injection to prevent reflux upon needle removal.

### *Pharmacological preparation*

Chemicals were reconstituted as follows: 5-Aminoimidazole-4-carboxamide 1-β-D-ribofuranoside (AICAR) (Sigma, #A9978) in PBS, metformin HCl (MET) (Sigma PHR1084) in PBS, 6-aminonicotinamide (6AN) (Cayman Chemical, #329-89-5) in DMSO, polydatin (polyD) (Cayman Chemical, #13932) in DMSO, oligomycin A (Sigma, #75371) in ethanol, N-[4-(trifluoromethoxy)phenyl]carbonohydrizonoyl dicyanide (FCCP) (Sigma, #C2920) in DMSO, rotenone (Sigma, #R8875) in DMSO, antimycin A (Sigma, #A8674) in DMSO, S1QEL.1 (Cayman Chemical, #20982) in DMSO, and S3QEL.2 (Cayman Chemical, 18556) in DMSO.

### *Murine immune cell isolation and activation*

Brain-infiltrating leukocytes were isolated as described (3). Spleens and cervical lymph nodes were dissociated by Dounce homogenization in RPMI base media (Gibco, #11875085) containing 15% heat-inactivated FBS, 5% sodium pyruvate, 5% NEAA, 5% penicillin/streptomycin, and 25 µM BME. Following red blood cell lysis, cells were passed through a 40 µm cell strainer (Falcon; #352340) to obtain a single cell suspension. Cells were plated at  $1-3 \times 10^6$  cells/well in 48-well tissue culture plates or  $0.5-1 \times 10^6$  cells/well in 96-well plates. When applicable, CD8<sup>+</sup> T cells were magnetically enriched using the EasySep Mouse CD8<sup>+</sup> T cell Isolation Kit (Stem Cell Technologies, #19853). For T cell activation, wells were coated with anti-CD3 (BD Biosciences, #145-2C11) and anti-CD28 (Biolegend, #102116) antibodies at 10 µg/ml in PBS. For peptide stimulation of OTI CD8<sup>+</sup> T cells, splenocytes were stimulated with 1 ng/mL SIINFELK peptide (Anaspec, AS-60193-1) and 10 ng/mL IL-2 (Peprotech, #212-12).

### *T cell transfers*

For adoptive transfer, immunomagnetically enriched OTI (Thy1.2) or OTI RFP (mt/mG) CD8<sup>+</sup> splenocytes were activated by anti-CD3/28, washed, counted, spun at 400g for 4 min, and resuspended in 50% FBS/ PBS at  $10^7$  cells/mL. Recipient Thy1.1 or B6 mice were irradiated with 400 rads 4 hours prior to intraperitoneal injection of 300 µL containing  $3 \times 10^6$  CD8<sup>+</sup> T cells. Counts and viability were confirmed by flow cytometry.

### *Extracellular flux assay*

The extracellular acidification rate (ECAR) was measured using a Seahorse XFe bioanalyzer (XFe96, Agilent Technologies).  $1 \times 10^6$  splenocytes/well in Seahorse RPMI media (Agilent, #103576-100) were seeded onto Cell-Tak (Corning, #354240)-coated Seahorse 96 well plates and pre-incubated at 37°C for 60 min in the absence of CO<sub>2</sub>. XF media was supplemented to achieve a final concentration 1 mM glutamine (ThermoFisher, #25030149) and 1 mM sodium pyruvate (Sigma, #S8636). ECAR was measured 24 hr after in vitro activation

with 10 µg/mL plate-bound anti-CD3/28. ECAR measurements were obtained under basal conditions and after the sequential addition of 10 mM glucose, 2 µM oligomycin (Sigma #75351), and 20 mM 2-DG (Cayman #14325). ECAR measurements were normalized to µg protein/well. Glycolytic capacity was calculated as the difference between the maximum ECAR following addition of oligomycin and the minimal ECAR prior to addition of glucose.

#### *NADPH bioluminescence assay*

NADPH flux assay was performed as described (4, 5), with modifications.  $10^6$  splenocytes were plated in 96-well black, clear-bottom plates and 50 µL detection reagent lacking the NADP cyclin enzyme and NADP cycling substrate was added (Promega, #G9082). G6P (40 µM) (Sigma, #G7879) and NADP<sup>+</sup> sodium salt hydrate (20 µM) (Cayman Chemical, #10004675) in 100 mM Tris pH 8.0 was added to each well. Luminescence was measured using a SpectraMax M3 spectrophotometer (Molecular Devices) with 500 ms integration at 37°C and results were analyzed during the linear phase of the kinetic assay. Concentration of NADPH was determined from a standard curve generated using NADPH sodium salt (Cayman Chemical, #9000743).

#### *Adenosine triphosphate (ATP) detection assay*

ATP was measured using the CellTiter-Glo 2.0 assay kit (Promega# G9241). Briefly,  $10^6$  splenocytes/well were plated in black clear bottom 96-well plates 24 hr after anti-CD3/28 activation. An equivalent volume of CellTiter-Glo 2.0 reagent was added to each well without washing off media. Reactions were incubated at room temperature for 10 min on a shaker. Luminescence was measured using a SpectraMax M3 spectrophotometer with 500 ms integration.

#### *Stable isotope tracing*

T cells isolated from C57BL/6 spleens were resuspended in complete lymphocyte media and  $5 \times 10^7$  cells were plated in a 75 cm<sup>2</sup> cell culture-treated flask that was pre-coated overnight with mouse anti-CD3 (purified anti-mouse CD3, Biolegend #100202) and anti-CD28 (Purified anti-mouse CD28 Antibody, Biolegend #102102) antibodies at a concentration of 10 mg/mL each. Unstimulated cells were plated in uncoated flasks under the same conditions. Cells were treated with 6-aminonicotinamide (6AN; 100 µM) (Cayman #329-89-5) at the time of plating. Three replicates were used for each experimental condition. On day 1 after plating the cells were washed with glucose-free RPMI (ThermoFisher Scientific, #11879020) and transferred to new flasks containing glucose-free RPMI, dialyzed low-glucose FBS (assayed at 11 µg/mL glucose) (ThermoFisher Scientific, #A3382001), and D-glucose-1,2-<sup>13</sup>C<sub>2</sub> (2 mg/mL) (Millipore Sigma, #453188). The cells were incubated in this media at 37°C for 4 hours with fresh 6-aminonicotinamide. Cells were washed once in cold PBS and then snap frozen. Samples were kept at -80°C until subsequent analysis. To measure pentose phosphate pathway metabolites, we employed a previously published liquid chromatography – mass spectrometry method, with minor modifications (6). In brief, cells were lysed in PBS and proteins were precipitated by adding chilled methanol-acetonitrile. Supernatants were clarified by high-speed centrifugation and then dried on a speed vacuum concentrator. Following reconstitution in running buffer, samples were separated on an Agilent Zorbax Extend C18 column (2.1 mm x 150 mm, 2 µm), followed by metabolite detection on an Agilent 6460 triple quadrupole mass spectrometer. Data were collected in negative electrospray ionization mode using dynamic multiple reaction monitoring. Mole percent enrichment was calculated based on peak area for each analyte relative to the corresponding isotope-labeled peak. Residual samples from the PPP analysis were dried and then sequentially derivatized with ethoxyamine and N-Methyl-N-(t-butylidimethylsilyl)trifluoroacetamide + 1% t-butylidimethylchlorosilane. Samples were then analyzed on an Agilent 5977B GC/MS using electron impact ionization in single ion monitoring mode. Lactic acid isotopomers were quantified as previously described (7), based on peak areas of lactic acid isotopologues (8).

#### *Flow cytometry, cytometric bead assay, and CyTOF*

Splenocytes were blocked with 1% BSA and 1 µg 2.4G2 antibody (CD16/CD32 BD Pharmingen, #553141). Cells were labeled with antibodies diluted 1:100 in block. The following antibodies were used (all BD Biosciences): FITC anti-CD69 (#557396), PE anti-CD25 (#558642), PerCP anti-CD8a (#551162), APC anti-CD8a (#553035), APC anti-Thy1.1/CD90.1 (#561409). For most experiments, viability was assessed with propidium iodide (Invitrogen, #P3566) or Fixable Viability Stain 700 (BD Biosciences, #564997) diluted 1:1000 in PBS. For analysis of T cell survival following 6AN treatment, cell death was measured using AnnexinV-FITC (BD Biosciences #556419) in AnnexinV binding buffer (BD Biosciences #556454) and propidium iodide (Miltenyi Biotech #130-093-233). Some samples were labeled with 5 µM 2',7'-dichlorofluorescein diacetate

(DCFDA) (ThermoFisher, #D399) in PBS, 100 mM 2-NBDG in PBS (Cayman Chemical, #11046), or 5  $\mu$ M carboxyfluorescein succinimidyl ester (CFSE) (BD Biosciences, #565082). Samples were run on an Attune NxT Acoustic Focusing flow cytometer (Thermo Scientific) running Attune NxT Software (v2.5). All samples were analyzed using FlowJo v10 (FlowJo LLC, Ashland, OR). Cytometric bead array analysis of proinflammatory cytokines was performed on an Accuri C6 flow cytometer (BD) using the Mouse Inflammation CBA kit (BD Biosciences, #552364). Cytometry by time-of-flight analysis was performed as described (2).

#### *Western blot assay*

$10^6$  splenocytes were washed with PBS and lysed in lysis buffer (Life Technologies, FNN0021) containing 1 mM phenylmethylsulfonyl fluoride (PMSF) (Fisher, NC9953637), 1 mM sodium orthovanadate (Sigma, #S6508), 1 mM sodium fluoride (Sigma, #S7920), 10  $\mu$ g/mL aprotinin (Roche, #10336624001), and 1  $\mu$ g/mL leupeptin (Sigma, #108976). Lysates were denatured for 5 min at 95°C in Laemmli buffer (1:1), loaded on 4–15% Tris HCl precast protein gels (BioRad, #345-0028), and resolved at 100 V for 2.5 hr. Proteins were transferred onto nitrocellulose (10 V overnight at 4°C; Amersham, #10600007). Membranes were blocked with 2.5% bovine serum albumin (Fisher, #1900-0016) in Tris-buffered saline containing 0.1% Tween-20 for 1 hr then incubated with primary antibody at 1:1000 overnight at 4 °C. Primary antibodies utilized were: phospho-AMPK (Thr172) (1:1000, Cell Signaling, #2535), total-AMPK (1:1000, Cell Signaling, #2532), phospho-mTOR (Ser 2448) (Cell Signaling, #5536),  $\beta$ -Actin (8H10D10) (1:1000, Cell Signaling, #3700).

#### *Cortical neuron electrophysiology and live cell imaging*

Mouse cortical neurons were prepared from E15 fetuses as described (9). Axion multielectrode plates (Axion Biosystems, # M768-tMEA-48B) were coated for 4 hr with 0.1% sterile polyethylenimine (Sigma Aldrich, #408727), washed 4 times with sterile water, and air dried overnight. Wells were incubated with 20  $\mu$ g/mL laminin (Sigma Aldrich L2020) for 45 min at 37°C. Neurons were plated at  $10^5$  cells/well in 50  $\mu$ L plate media (Dulbecco's modified Eagle medium (ThermoFisher, #11965092) with 10% FBS and 10% F12 supplement (Invitrogen 31765-035)). After 2 hr at 37°C, volume was brought to 500  $\mu$ L/well with Neurobasal media (Invitrogen 21103-049) containing 2% B27 supplement (Invitrogen, #17504-044), 1% penicillin-streptomycin, and 0.5 mM Glutamax (ThermoFisher, #35050-061) supplemented with BDNF (10 ng/mL) (PeproTech, #450-02) and IGF-1 (10 ng/mL) (BD Biosciences, #354037). Half-media changes were performed every other day. Cortical neurons co-incubated with CD8<sup>+</sup> T cells were treated with 100 ng/ml IFN $\gamma$  (R&D, #485-MI-100) for 24 hr prior to the addition of lymphocytes (10). CD8<sup>+</sup> OTI T cells were added at an E:T ratio of 2:1. For live cell imaging, neurons were plated on poly-ornithine coated (0.5 mg/mL; >4 hours at 37°C) microisolation chambers or 96 well glass bottom plates and transduced with AAV1.Syn.OVA-eGFP or AAV1.Syn.eGFP. Imaging was performed on an InCuCyte SX5 Liv-Cell Analysis System utilizing the built-in analysis platform to quantify EGFP<sup>+</sup> area over time (normalized to baseline and reference controls). Imaging was initiated at 10-12 days in vitro. For electrophysiology, Axion multielectrode plates (Axion Biosystems, # M768-tMEA-48B) were coated for 4 hr with 0.1% sterile polyethylenimine (Sigma Aldrich, #408727), washed 4 times with sterile water, and air dried overnight. Wells were incubated with 20  $\mu$ g/mL laminin (Sigma Aldrich L2020) for 45 min at 37°C. Realtime electrophysiological data were obtained starting on day 14-17 in vitro using the Axion Maestro platform. Spontaneous extracellular potentials were recorded for 10 minutes and wells with  $\leq 2$  active electrodes were excluded from the assay design. Active wells were divided into tiers according to overall spike number and then proportionately assigned to experimental conditions. Spontaneous firing was recorded for three 10-minute epochs at 37°C/5%CO<sub>2</sub>. Extracellular field potential recordings were collected every 10 minutes with a 10-minute rest between recordings over 18 hours. Filtered extracellular field potentials (Butterworth high pass at 200 Hz; lowpass at 3000 Hz) with unipolar peaks that exceeded 6 standard deviations (STD) above baseline as assessed by adaptive thresholding for each individual electrode were defined as spikes. Bursts were defined as  $\geq 5$  spikes on a single electrode with a maximum inter-spike interval of 100 msec and network bursts were defined as  $\geq 50$  spikes detected on  $\geq 35\%$  of electrodes/well with a maximum inter-spike interval of 100 msec.

#### *scRNAseq Analysis*

Compressed data from Gene Expression Omnibus series GSE138266 (11) were downloaded and unpacked to yield subject specific matrix, barcode, and gene files which were used to create Seurat objects in R (12, 13). The 6 MS patient-derived CSF scRNAseq samples and the 6 control CSF scRNAseq samples were merged into separate Seurat objects and normalized. After joining the layers in each object, variable features were identified, and a list of anchor genes was generated and used for integrating the two datasets. Data were

scaled, principal component analysis was performed, and dimension reduction was accomplished using uniform manifold approximation and projection. The shared nearest-neighbor graph was constructed with default Seurat parameters and used to determine clusters with the Louvain algorithm. Cell types in the resulting 16 clusters were further defined using ScType (14). Two CD8<sup>+</sup> clusters were identified and combined for subsequent analysis. Differentially expressed genes within the CD8<sup>+</sup> cluster between MS and controls were identified using the Wilcoxon rank sum test via the Presto fast implementation. The average log<sub>2</sub> fold change between MS and control and the Bonferroni-corrected P-value for the comparison were calculated and filtered on P<0.05. Selected target genes were queried and violin plots were generated.

## Methods References

1. Clarkson BD, Johnson RK, Bingel C, Lothaller C, and Howe CL. Preservation of antigen-specific responses in cryopreserved CD4(+) and CD8(+) T cells expanded with IL-2 and IL-7. *J Transl Autoimmun.* 2022;5:100173.
2. Clarkson BD, Grund EM, Standiford MM, Mirchia K, Westphal MS, Muschler LS, et al. CD8+ T cells recognizing a neuron-restricted antigen injure axons in a model of multiple sclerosis. *J Clin Invest.* 2023;133(21).
3. Howe CL, LaFrance-Corey RG, Overlee BL, Johnson RK, Clarkson BDS, and Goddery EN. Inflammatory monocytes and microglia play independent roles in inflammatory ictogenesis. *J Neuroinflammation.* 2022;19(1):22.
4. Zhu A, Romero R, and Petty HR. An enzymatic colorimetric assay for glucose-6-phosphate. *Anal Biochem.* 2011;419(2):266-70.
5. Zerez CR, Lee SJ, and Tanaka KR. Spectrophotometric determination of oxidized and reduced pyridine nucleotides in erythrocytes using a single extraction procedure. *Anal Biochem.* 1987;164(2):367-73.
6. Lee HJ, Kremer DM, Sajjakulnukit P, Zhang L, and Lyssiotis CA. A large-scale analysis of targeted metabolomics data from heterogeneous biological samples provides insights into metabolite dynamics. *Metabolomics.* 2019;15(7):103.
7. Gonsalves WI, Ramakrishnan V, Hitosugi T, Ghosh T, Jevremovic D, Dutta T, et al. Glutamine-derived 2-hydroxyglutarate is associated with disease progression in plasma cell malignancies. *JCI Insight.* 2018;3(1).
8. Jennings ME, 2nd, and Matthews DE. Determination of complex isotopomer patterns in isotopically labeled compounds by mass spectrometry. *Anal Chem.* 2005;77(19):6435-44.
9. Clarkson BDS, Grund E, David K, Johnson RK, and Howe CL. ISGylation is induced in neurons by demyelination driving ISG15-dependent microglial activation. *J Neuroinflammation.* 2022;19(1):258.
10. Clarkson BDS, Patel MS, LaFrance-Corey RG, and Howe CL. Retrograde interferon-gamma signaling induces major histocompatibility class I expression in human-induced pluripotent stem cell-derived neurons. *Ann Clin Transl Neurol.* 2018;5(2):172-85.
11. Schafflick D, Xu CA, Hartlehnert M, Cole M, Schulte-Mecklenbeck A, Lautwein T, et al. Integrated single cell analysis of blood and cerebrospinal fluid leukocytes in multiple sclerosis. *Nat Commun.* 2020;11(1):247.
12. Hao Y, Hao S, Andersen-Nissen E, Mauck WM, 3rd, Zheng S, Butler A, et al. Integrated analysis of multimodal single-cell data. *Cell.* 2021;184(13):3573-87 e29.
13. Butler A, Hoffman P, Smibert P, Papalexi E, and Satija R. Integrating single-cell transcriptomic data across different conditions, technologies, and species. *Nat Biotechnol.* 2018;36(5):411-20.
14. Ianevski A, Giri AK, and Aittokallio T. Fully-automated and ultra-fast cell-type identification using specific marker combinations from single-cell transcriptomic data. *Nat Commun.* 2022;13(1):1246.

**SUPPLEMENTAL FIGURES**

**Supplemental Figure 1.**

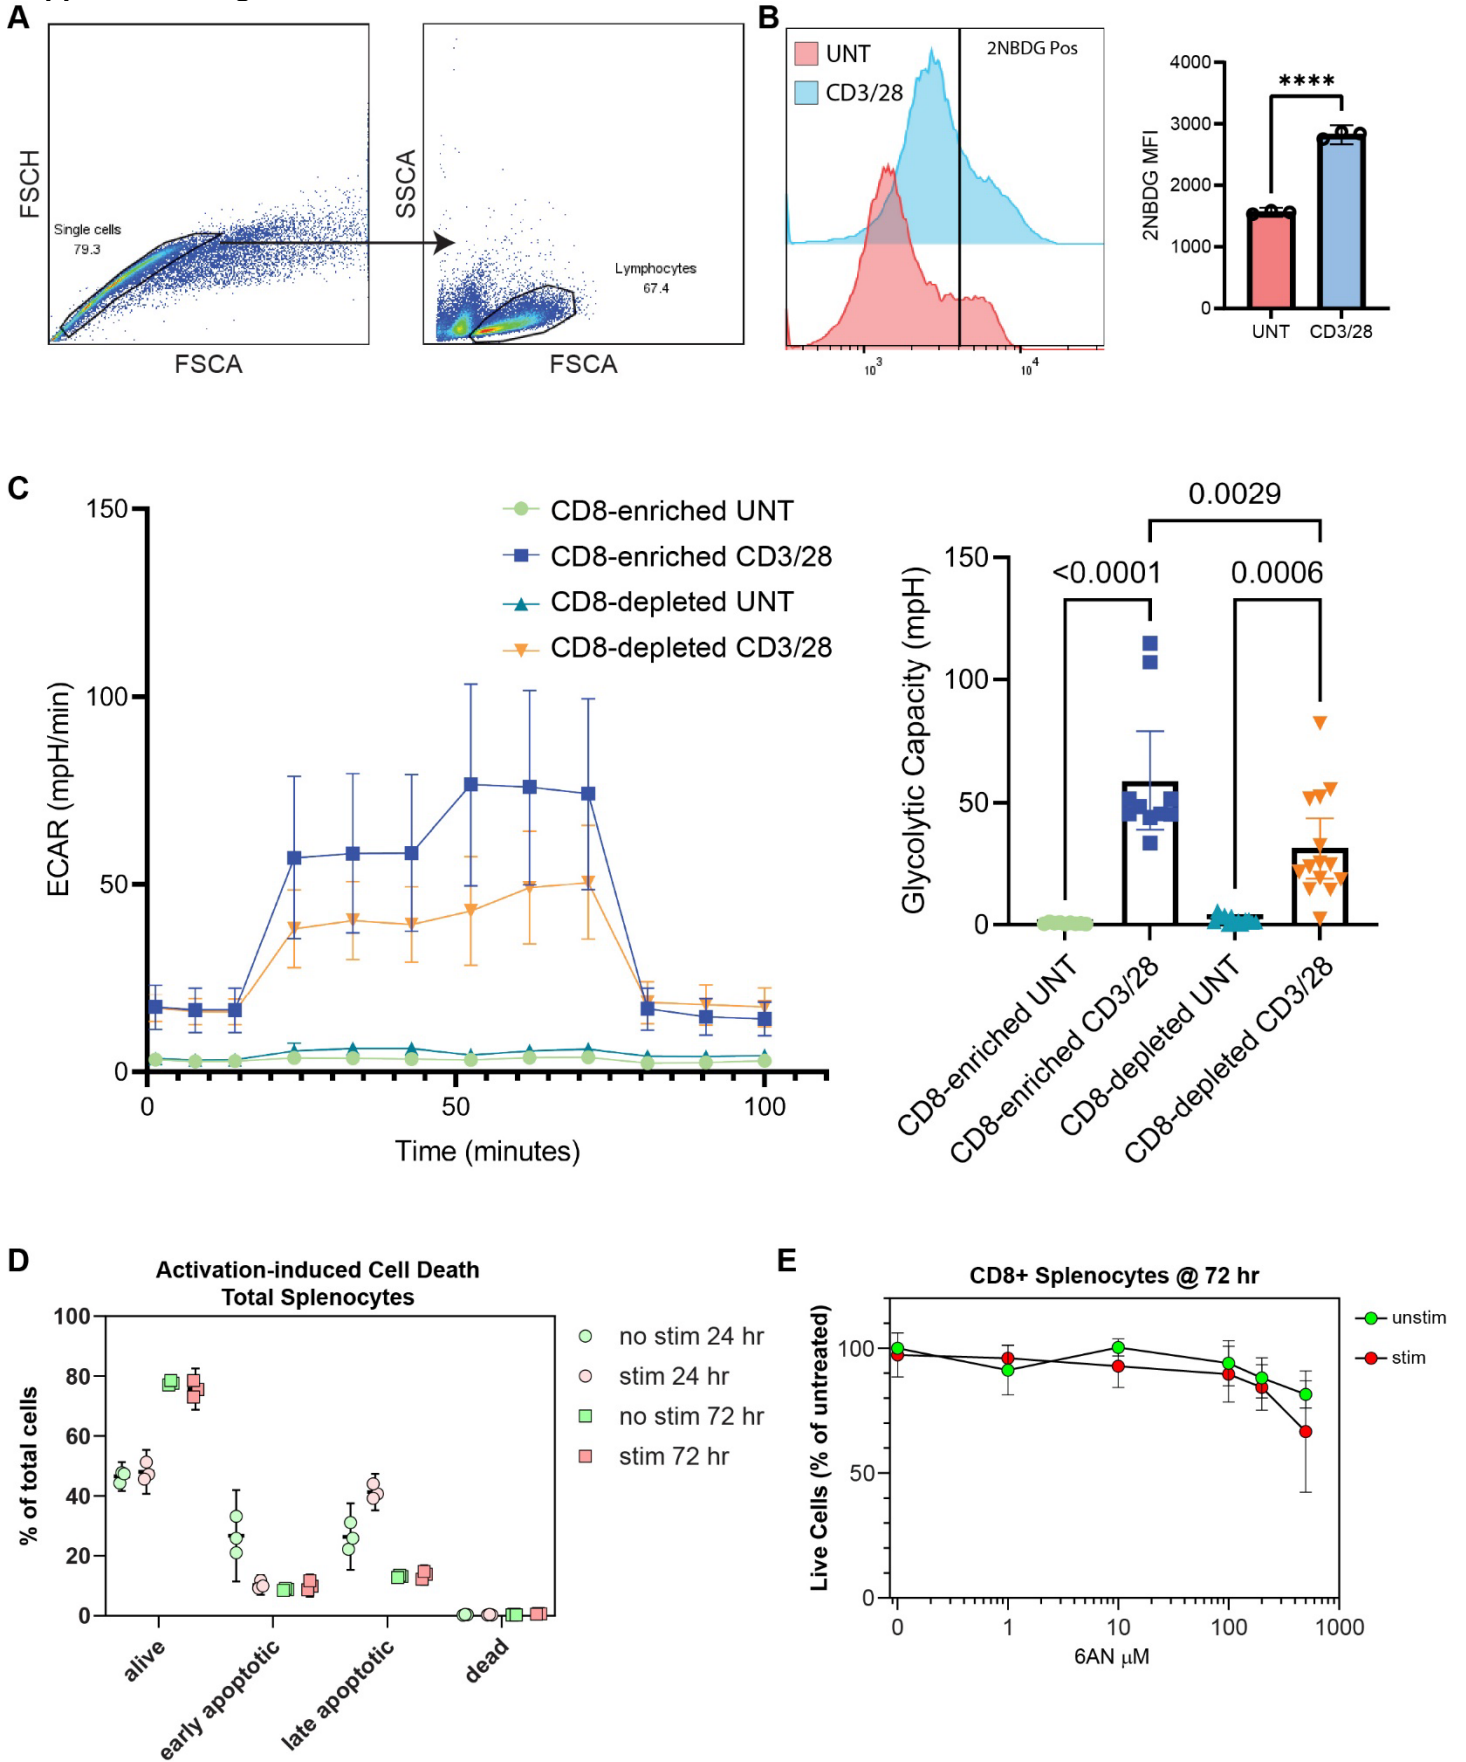

### Supplemental Figure 1

(A) Gating strategy used to identify single cells and lymphocytes based on scatter profile. Gates were used for down-stream flow cytometry analyses. (B) Representative histograms showing that CD3/28 stimulation drove increased uptake of the fluorescent glucose analog 2-NBDG in splenocytes at 24 hr. The effect was significant by Mann Whitney test (n=3 per condition); \*\*\*\* P<0.0001. Unt = unstimulated; CD3/28 = stimulated with plate-bound CD3/CD28 antibodies for 24 hr. (C) Extracellular acidification rate (ECAR) is greater in CD8-enriched compared to CD8-depleted splenocytes. (left) ECAR measured using the Seahorse XF analyzer in magnetically-enriched or depleted splenocytes under non-activated (UNT) or CD3/28-activated (CD3/28) conditions at t = 24hrs; (right) quantification of glycolytic capacity, n=11-13/condition. (D) Mouse splenocytes were stimulated by plate-bound CD3/CD28 antibody or left unstimulated for 24 or 72 hours and cell death was assessed by flow cytometry. As expected, apoptotic cells were increased at 24 hr in the stimulated condition (early apoptotic: P<0.0001 by Tukey's pairwise comparison vs 24 hr unstimulated; late apoptotic: P<0.0001 by Tukey's pairwise comparison vs 24 hr unstimulated; alive or dead, not significant), consistent with activation-induced cell death. By 72 hr, there was no difference in any of the groups (alive, early apoptotic, late apoptotic, dead) between stimulated and unstimulated conditions (F(9,32)=0.0001620, P>0.9999 by two-way ANOVA for treatment effect; alive, unstim vs stim: P=0.7225; early apoptotic, unstim vs stim: P=0.9049; late apoptotic, unstim vs stim: P=0.9939; dead, unstim vs stim: P=0.9989; Tukey's multiple comparison). (E) 6AN was not toxic to CD8+ splenocytes through 100  $\mu$ M (unstim, untreated vs 100  $\mu$ M: P=0.3155; stim, untreated vs 100  $\mu$ M: P=0.2876; Tukey's multiple comparison). Stimulation did not confer a significant survival effect for any dose of 6AN, relative to unstimulated (F(1,24)=2.423, P=0.1327 by two-way ANOVA).

## Supplemental Figure 2

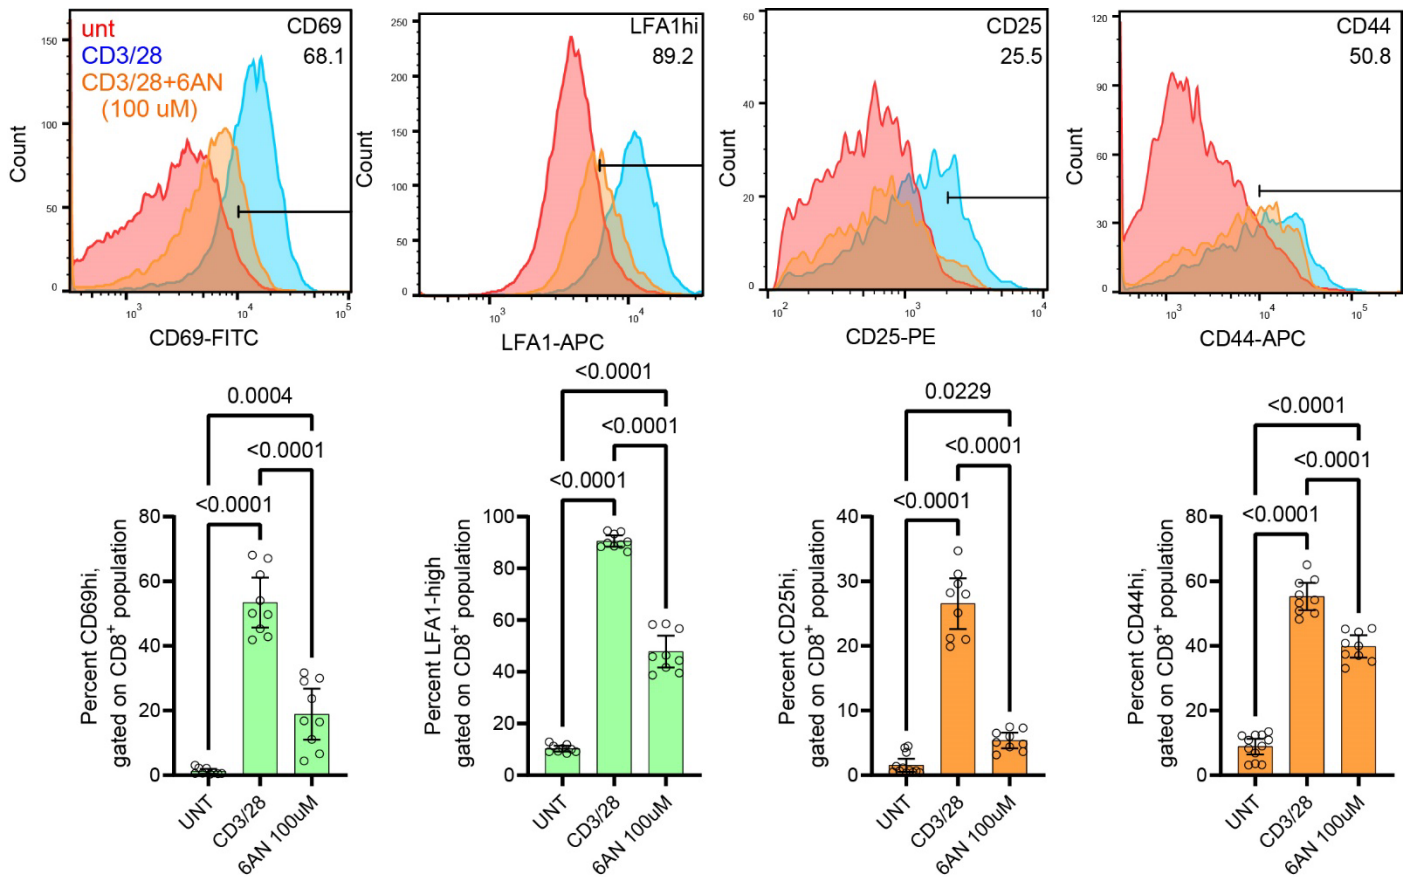

(Top) Representative histograms show gating strategy for surface activation markers including CD69, LFA-1, CD25, and CD44 on CD8<sup>+</sup> splenocytes 24 hr after treatment as indicated (unt = unstimulated; CD3/28 = anti-CD3/28 stimulated plus vehicle; CD3/28+6AN = anti-CD3/28 stimulated plus 6AN (100 µM)). Percentages shown in the upper right quadrant represent CD3/28-stimulated plus vehicle condition. (Bottom) Quantitation of CD69, LFA-1, CD25, and CD44 expression on CD8<sup>+</sup> splenocytes 24 hr after treatment pooled from 3 separate experiments (N=3/condition; n=3/condition/experiment). Error bars are 95%CI; multiple comparison corrected P values are shown (one-way ANOVA with Tukey multiple comparison correction).

### Supplemental Figure 3

#### SPLENOCYTES

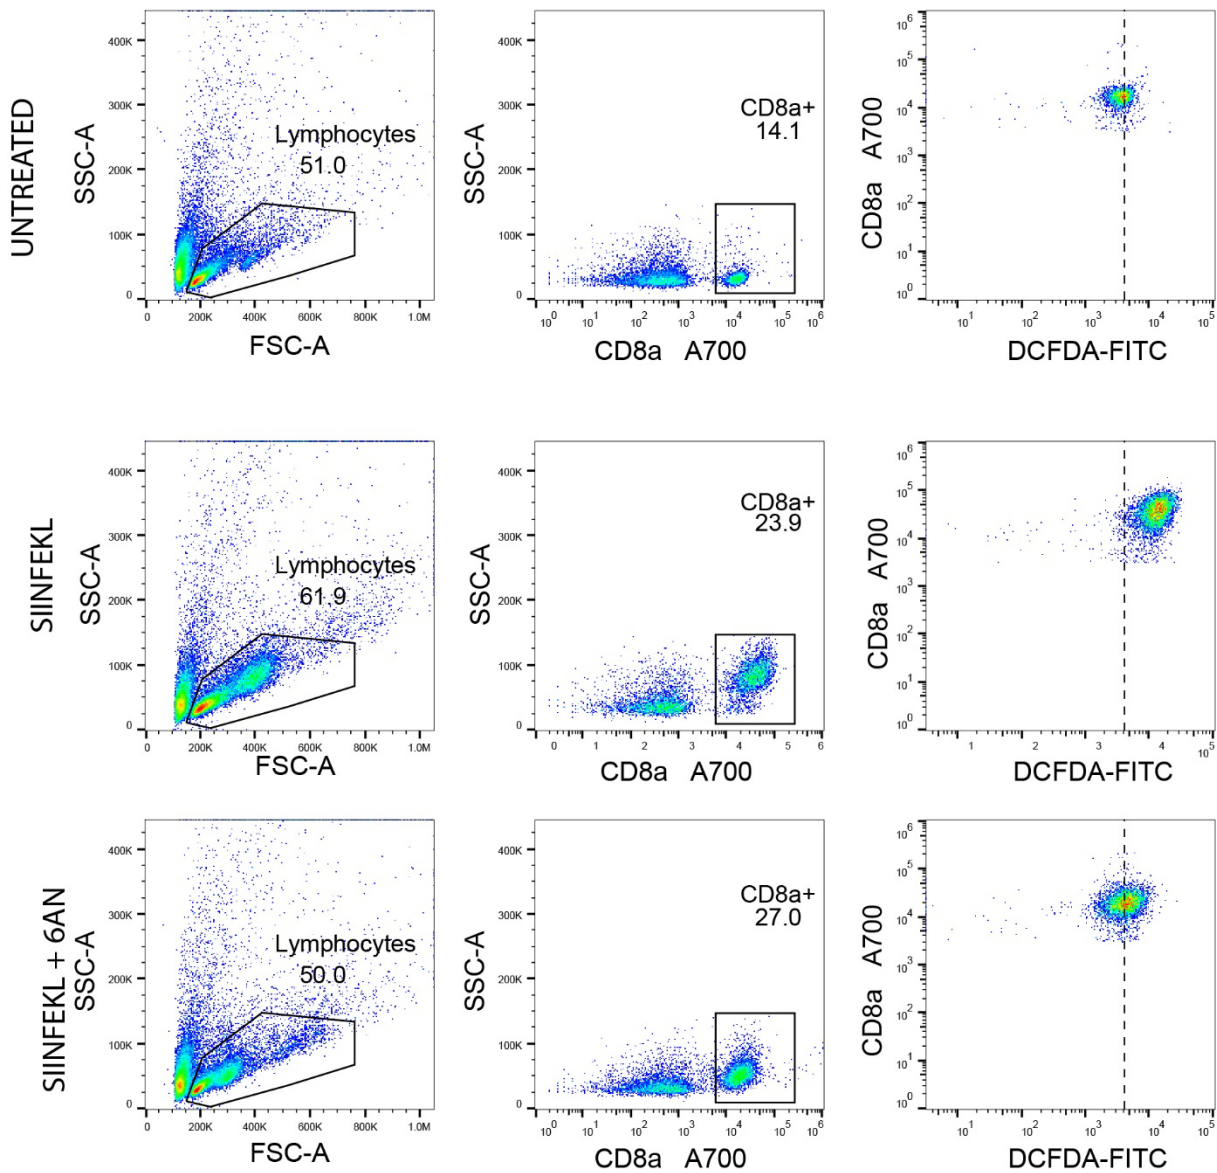

Gating strategy for measuring ROS production in OTI CD8<sup>+</sup> splenocytes 18 hours after stimulation with SIINFEKL in the absence or presence of 6AN (100  $\mu$ M). Lymphocytes were gated on scatter profile and singlet discrimination. CD8<sup>+</sup> T cells were gated and intracellular ROS levels were quantified by measuring levels (MFI) of the redox-sensitive dye 2',7'-dichlorofluorescein diacetate (DCFDA).

Supplemental Figure 4

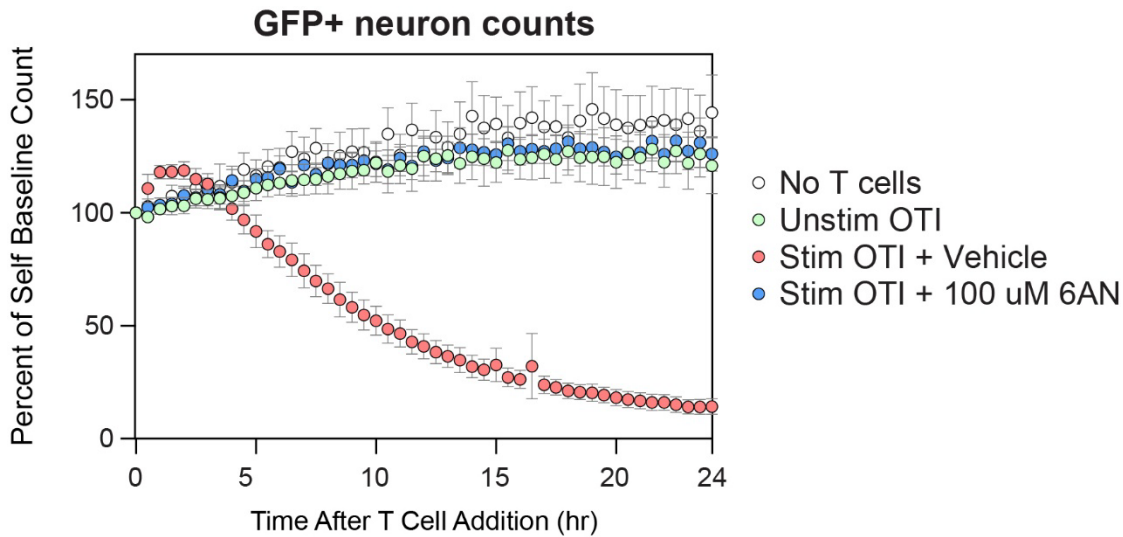

Live cell analysis of GFP+ neuron number calculated every 30 minutes over the first 24 hr after addition of unstimulated OTI T cells (n=15), CD3/28-stimulated OTI T cells pre-treated with vehicle (n=16), CD3/28-stimulated OTI T cells pre-treated with 6AN (100  $\mu$ M) (n=15), or no T cells (n=13). Cell numbers were derived from the counting module on the Incucyte instrument. The number of GFP+ cells was significantly reduced in cultures co-incubated with stimulated OTI T cells pretreated with vehicle compared to cultures co-incubated with OTI T cells pretreated with 6AN by 5 hrs ( $F(4,70)=102.2$ ,  $P<0.0001$  for treatment effect by two-way ANOVA).

## Supplemental Figure 5

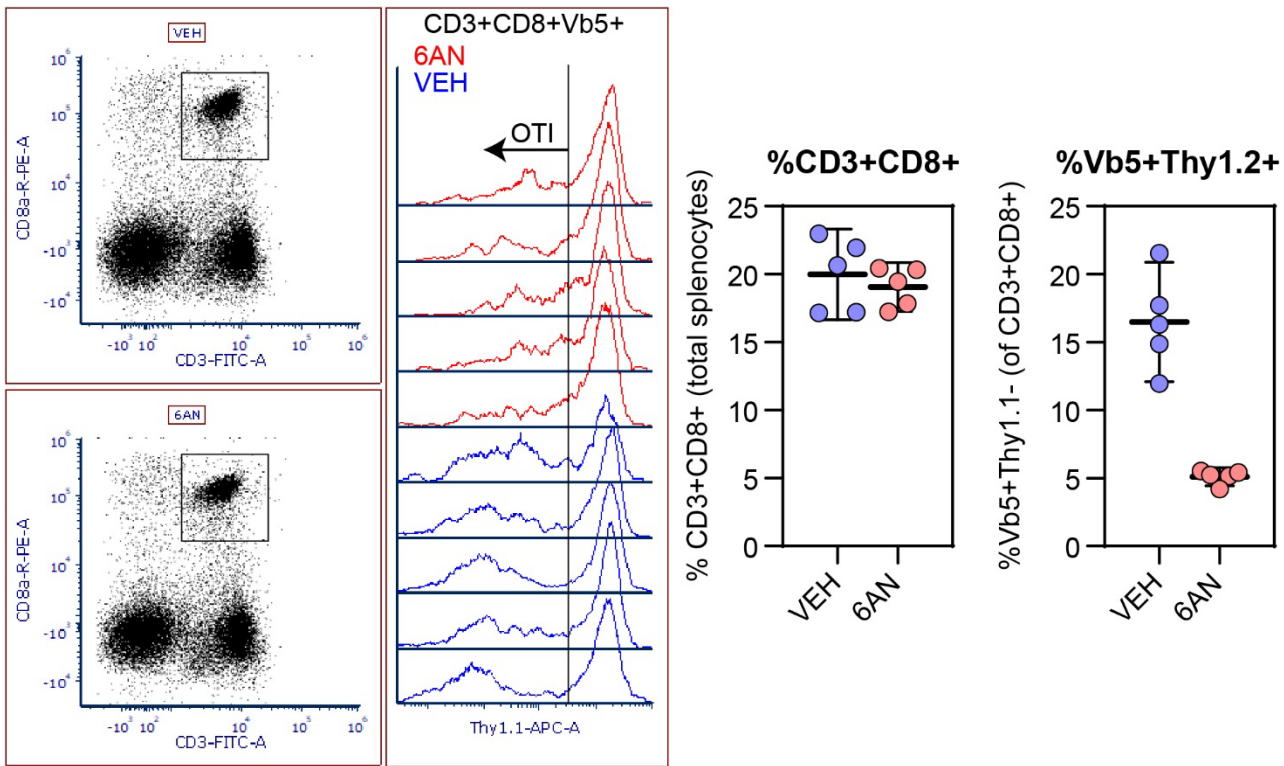

Analysis of Thy1.2<sup>+</sup> (adoptively transferred) cells in the spleen of Thy1.1<sup>+</sup> recipients at 8 days post-transfer. CD3<sup>+</sup>CD8<sup>+</sup> cells were gated in splenocytes from recipients receiving OTI splenocytes pretreated with vehicle (VEH) or pretreated with 6AN (100  $\mu$ M) and then analyzed for level of Thy1.1 expression. While the percent of CD3<sup>+</sup>CD8<sup>+</sup> cells in the spleen did not differ between conditions ( $P=0.6905$  by Mann Whitney), the percentage of these cells that were V $\beta$ 5.1/5.2<sup>+</sup> and Thy1.1<sup>-</sup> was reduced from about 15% in mice receiving OTI splenocytes pretreated with vehicle to about 5% in mice receiving OTI splenocytes pretreated with 6AN ( $P=0.0079$  by Mann Whitney).

## Supplemental Figure 6

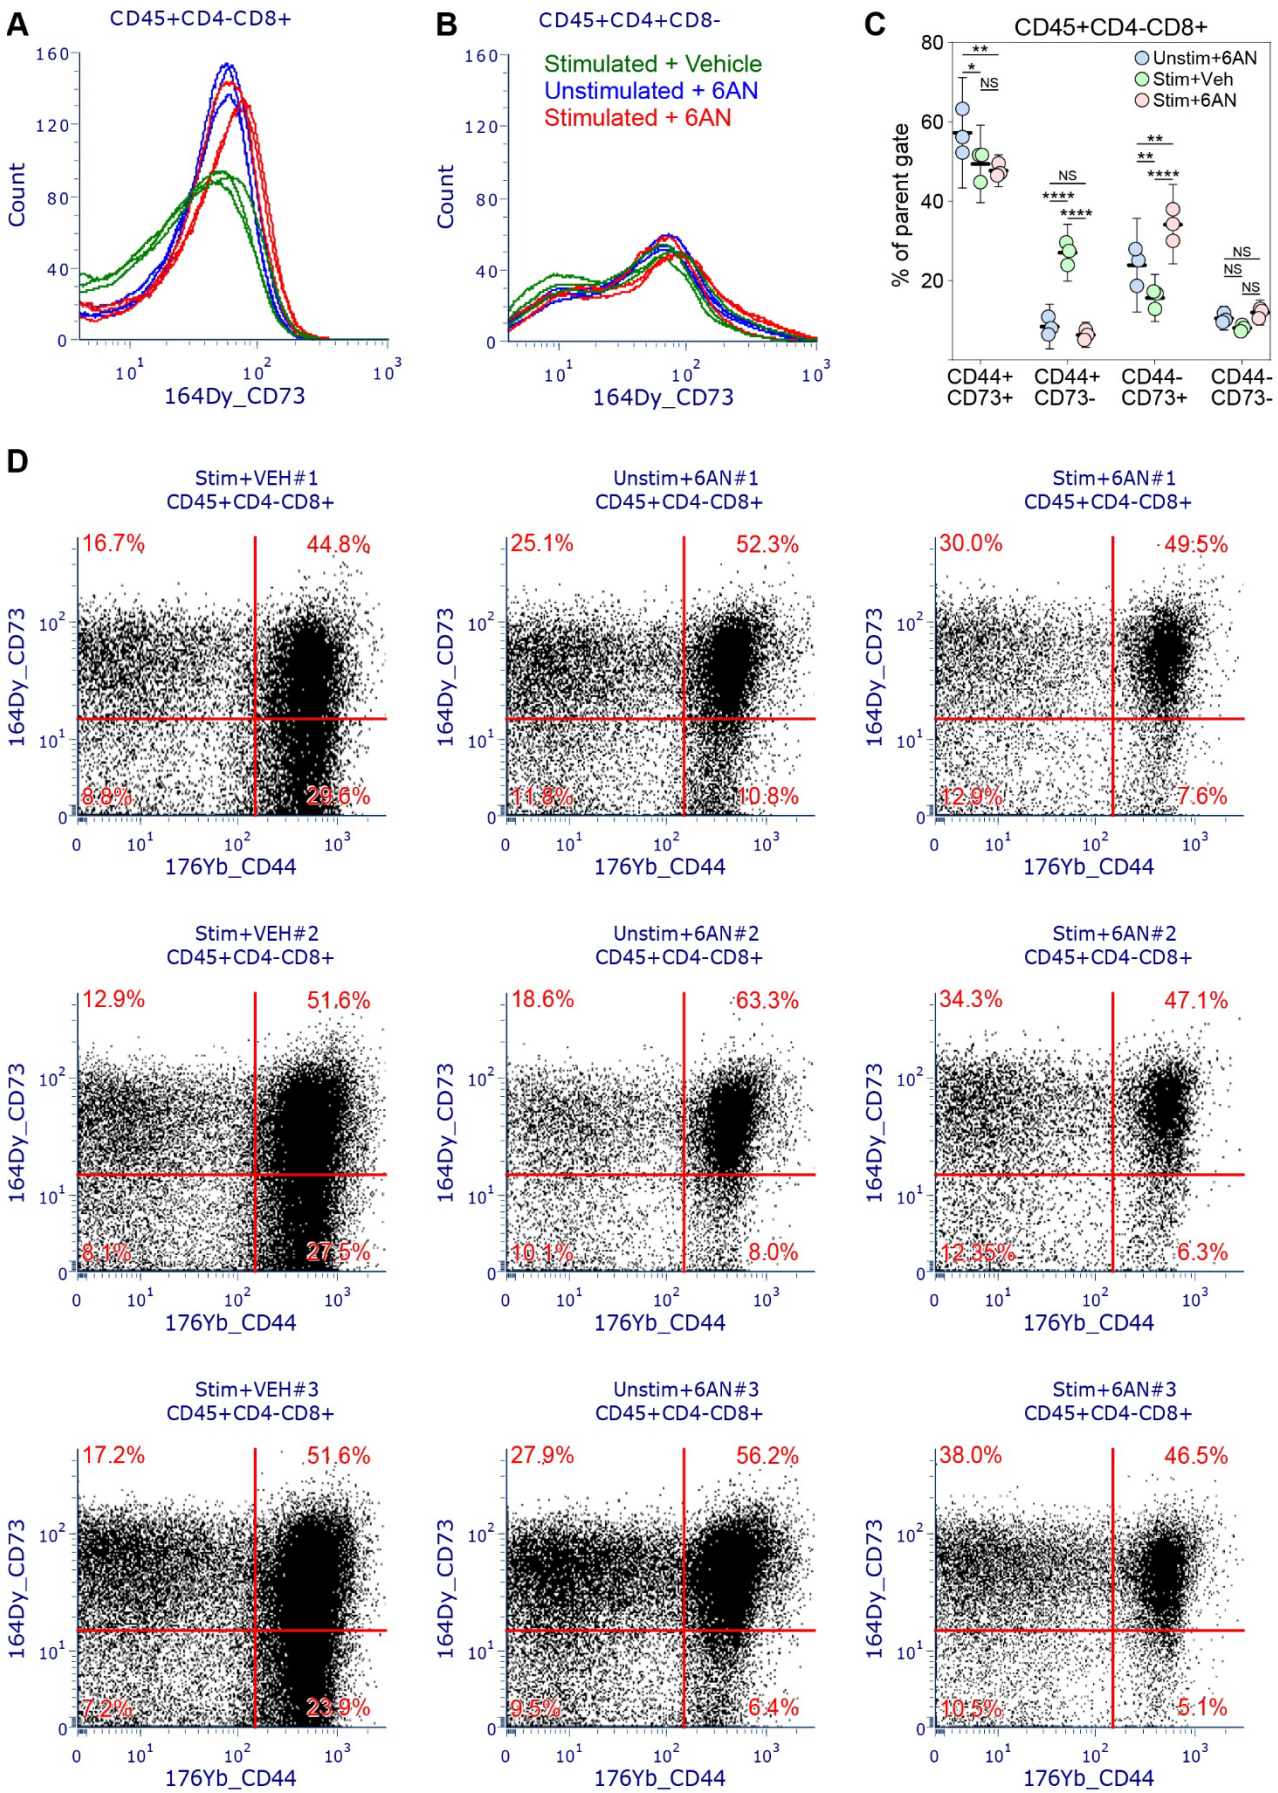

### Supplemental Figure 6

(A) CD73 surface expression was reduced on cervical lymph node CD45<sup>+</sup>CD4<sup>-</sup>CD8<sup>+</sup> cells at 8 days post-transfer in mice receiving adoptive transfer of CD3/28-stimulated OTI splenocytes pre-treated with vehicle, relative to mice receiving adoptive transfer of CD3/28-stimulated OTI splenocytes pre-treated with 6AN or unstimulated OTI splenocytes pre-treated with 6AN (N=3 per condition). (B) This effect was not observed in CD45<sup>+</sup>CD4<sup>+</sup>CD8<sup>+</sup> cells in the cervical lymph nodes. (C) The effect of 6AN on CD73 downmodulation on CD45<sup>+</sup>CD4<sup>-</sup>CD8<sup>+</sup> cells was significant within the CD44<sup>-</sup> population, with compensatory changes in the percentage of cells in the CD44<sup>+</sup>CD73<sup>-</sup> population. Error bars are 95%CI; \* P<0.05, \*\* P<0.01, \*\*\* P<0.001, \*\*\*\* P<0.0001; NS = not significant by Tukey's pairwise analysis on two-way ANOVA. (D) Representative flow plots for the expression of CD73 and CD44 on CD45<sup>+</sup>CD4<sup>-</sup>CD8<sup>+</sup> cervical lymph node cells. Mice receiving stimulated OTI T cells pretreated with vehicle showed a large increase in a population of CD73<sup>-</sup>CD44<sup>+</sup> cervical lymph node cells; this effect was blocked by treatment of the OTI cells with 6AN prior to adoptive transfer.

## Supplemental Figure 7

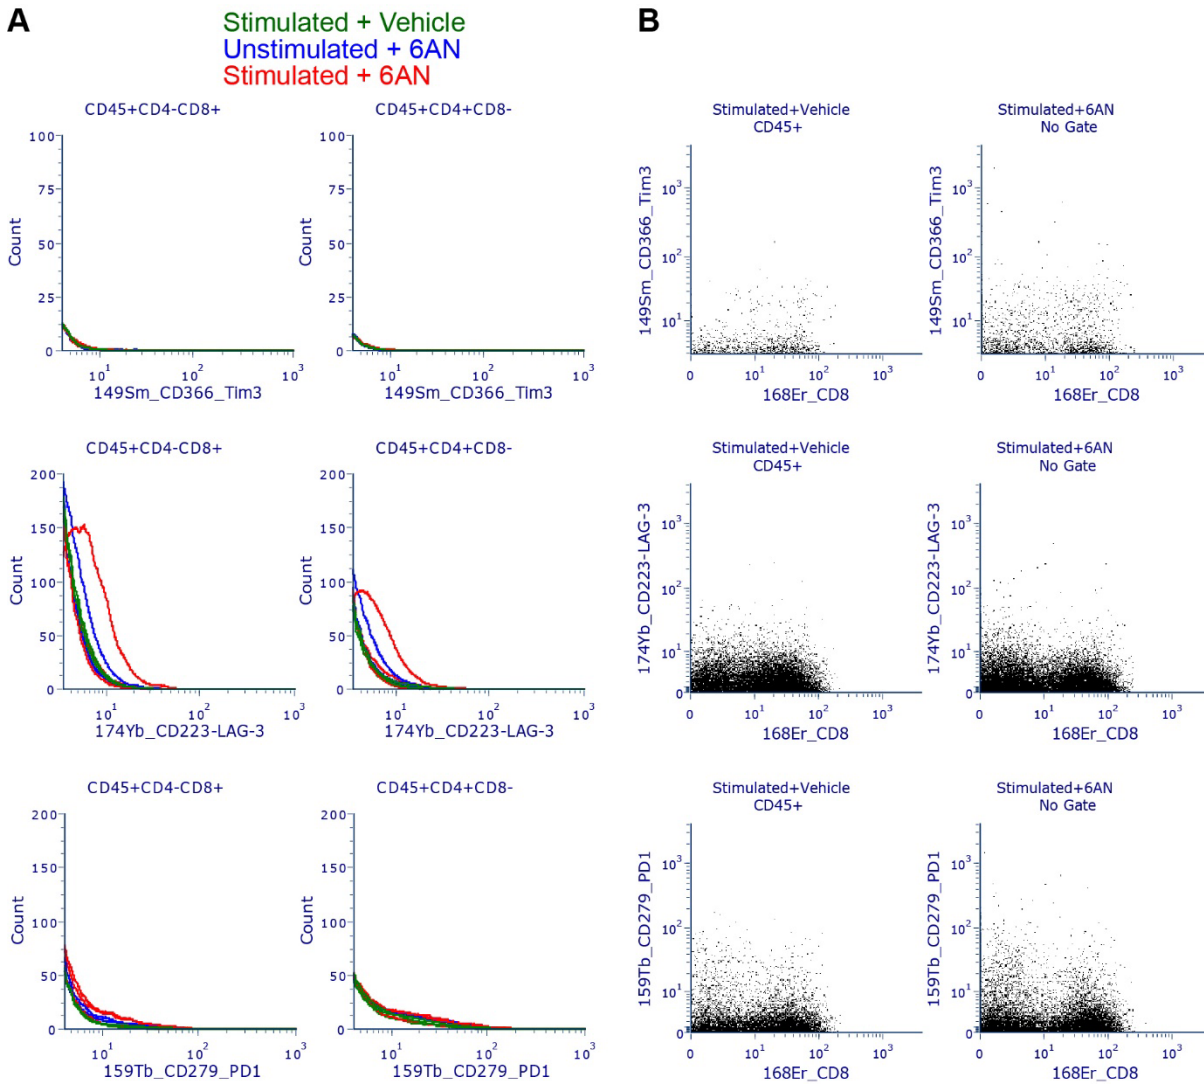

**(A)** Surface expression of TIM3, LAG3, and PD1 was not different on cervical lymph node CD45<sup>+</sup>CD4<sup>-</sup>CD8<sup>+</sup> cells at 8 days post-transfer in mice receiving adoptive transfer of CD3/28-stimulated OTI splenocytes pre-treated with vehicle, relative to mice receiving adoptive transfer of CD3/28-stimulated OTI splenocytes pre-treated with 6AN or unstimulated OTI splenocytes pre-treated with 6AN (N=3 per condition). **(B)** Representative flow plots for the expression of TIM3, LAG3, and PD1 on CD45<sup>+</sup>CD4<sup>-</sup>CD8<sup>+</sup> cervical lymph node cells.

## Supplemental Figure 8

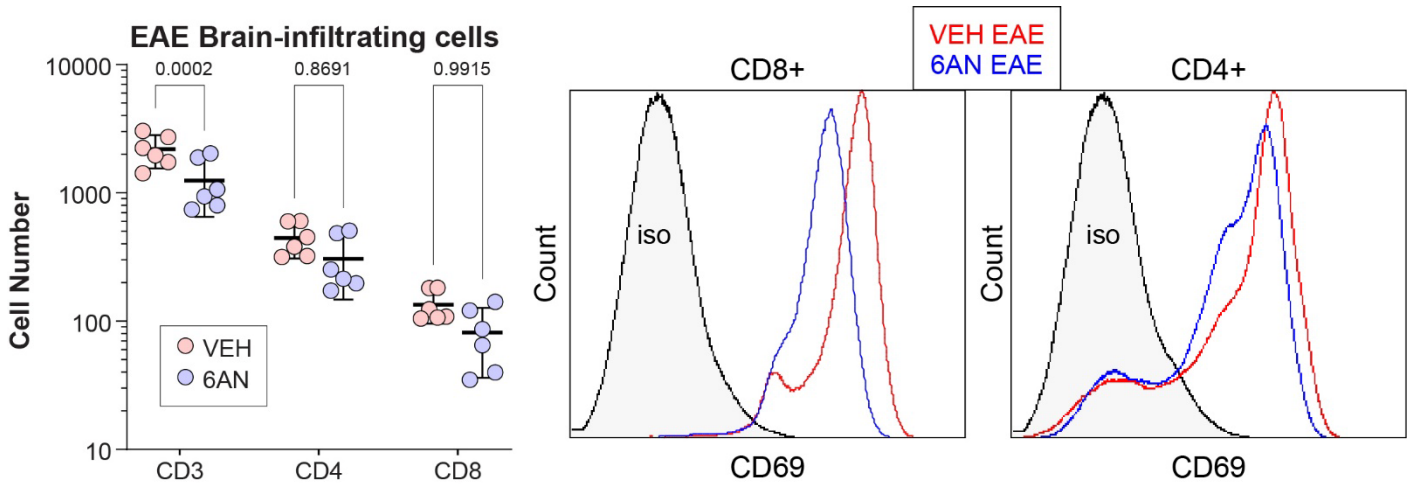

(Left) Brain-infiltrating cells were isolated 36 days after EAE induction from mice treated at 11, 13, 15, 17, 19 dpi with 6AN (5 mg/kg) (N=6) or with vehicle (N=6). Two-way ANOVA revealed a significant difference between treatment groups ( $F(1,30)=10.48$ ,  $P=0.0029$ ), with a significant difference in total  $CD3^+$  cell numbers ( $P=0.0002$  by Sidak's multiple comparison test) but no difference in the number of  $CD4^+$  ( $P=0.8691$ ) or  $CD8^+$  subsets ( $P=0.9915$ ). (Right) Representative histogram of CD69 expression level on  $CD8^+$  or  $CD4^+$  cells in the brain infiltrate at 28 dpi in mice treated with 6AN (blue) or vehicle (red).

**SUPPLEMENTAL TABLE 1**

**2way ANOVA of G6P:ANOVA results**

|                              | Data Set-A           | Data Set-B | Data Set-C      | Data Set-D             | Data Set-E |
|------------------------------|----------------------|------------|-----------------|------------------------|------------|
| Table Analyzed               | G6P                  |            |                 |                        |            |
| Two-way ANOVA<br>Alpha       | Ordinary<br>0.05     |            |                 |                        |            |
| Source of Variation          | % of total variation | P value    | P value summary | Significant?           |            |
| Interaction                  | 13.54                | 0.0042     | **              | Yes                    |            |
| met_species                  | 75.54                | <0.0001    | ****            | Yes                    |            |
| Tx                           | 2.975e-005           | >0.9999    | ns              | No                     |            |
| ANOVA table                  | SS                   | DF         | MS              | F (DFn, DFd)           | P value    |
| Interaction                  | 2359                 | 4          | 589.8           | F (4, 18) = 5.575      | P=0.0042   |
| met_species                  | 13167                | 2          | 6583            | F (2, 18) = 62.23      | P<0.0001   |
| Tx                           | 0.005185             | 2          | 0.002593        | F (2, 18) = 2.451e-005 | P>0.9999   |
| Residual                     | 1904                 | 18         | 105.8           |                        |            |
| Data summary                 |                      |            |                 |                        |            |
| Number of columns (Tx)       | 3                    |            |                 |                        |            |
| Number of rows (met_species) | 3                    |            |                 |                        |            |
| Number of values             | 27                   |            |                 |                        |            |

**2way ANOVA of G6P:Multiple comparisons**

|                                                               | Data Set-A | Data Set-B | Data Set-C | Data Set-D | Data Set-E | Data Set-F | Data Set-G | Data Set-H |
|---------------------------------------------------------------|------------|------------|------------|------------|------------|------------|------------|------------|
| Within each row, compare columns (simple effects within rows) |            |            |            |            |            |            |            |            |
| Number of families                                            | 3          |            |            |            |            |            |            |            |
| Number of comparisons per family                              | 3<br>0.05  |            |            |            |            |            |            |            |

| Alpha                             | Mean Diff. | 95.00% CI of diff. | Below threshold? | Summary     | Adjusted P Value |    |       |      |
|-----------------------------------|------------|--------------------|------------------|-------------|------------------|----|-------|------|
| Tukey's multiple comparisons test |            |                    |                  |             |                  |    |       |      |
| m0                                |            |                    |                  |             |                  |    |       |      |
| UNT vs. ACT                       | 12.80      | -8.633 to 34.23    | No               | ns          | 0.3035           |    |       |      |
| UNT vs. ACT+6AN                   | -14.60     | -36.03 to 6.833    | No               | ns          | 0.2185           |    |       |      |
| ACT vs. ACT+6AN                   | -27.40     | -48.83 to -5.967   | Yes              | *           | 0.0114           |    |       |      |
| m1                                |            |                    |                  |             |                  |    |       |      |
| UNT vs. ACT                       | 2.100      | -19.33 to 23.53    | No               | ns          | 0.9662           |    |       |      |
| UNT vs. ACT+6AN                   | 0.8333     | -20.60 to 22.27    | No               | ns          | 0.9946           |    |       |      |
| ACT vs. ACT+6AN                   | -1.267     | -22.70 to 20.17    | No               | ns          | 0.9875           |    |       |      |
| m2                                |            |                    |                  |             |                  |    |       |      |
| UNT vs. ACT                       | -14.87     | -36.30 to 6.566    | No               | ns          | 0.2076           |    |       |      |
| UNT vs. ACT+6AN                   | 13.70      | -7.733 to 35.13    | No               | ns          | 0.2585           |    |       |      |
| ACT vs. ACT+6AN                   | 28.57      | 7.134 to 50.00     | Yes              | **          | 0.0085           |    |       |      |
| Test details                      | Mean 1     | Mean 2             | Mean Diff.       | SE of diff. | N1               | N2 | q     | DF   |
| m0                                |            |                    |                  |             |                  |    |       |      |
| UNT vs. ACT                       | 33.70      | 20.90              | 12.80            |             | 3                | 3  | 2.156 | 18.0 |
| UNT vs. ACT+6AN                   | 33.70      | 48.30              | -14.60           | 8.398       | 3                | 3  | 2.459 | 0    |
| ACT vs. ACT+6AN                   | 20.90      | 48.30              | -27.40           | 8.398       | 3                | 3  | 4.614 | 18.0 |
|                                   |            |                    |                  | 8.398       |                  |    |       | 0    |
|                                   |            |                    |                  |             |                  |    |       | 18.0 |
| m1                                |            |                    |                  |             |                  |    |       |      |
| UNT vs. ACT                       | 6.800      | 4.700              | 2.100            |             | 3                | 3  | 0.353 | 0    |
| UNT vs. ACT+6AN                   | 6.800      | 5.967              | 0.8333           | 8.398       | 3                | 3  | 6     |      |
| ACT vs. ACT+6AN                   | 4.700      | 5.967              | -1.267           | 8.398       | 3                | 3  | 0.140 |      |
|                                   |            |                    |                  | 8.398       |                  |    | 3     | 18.0 |
|                                   |            |                    |                  |             |                  |    | 0.213 | 0    |
| m2                                |            |                    |                  |             |                  |    |       |      |
| UNT vs. ACT                       | 59.50      | 74.37              | -14.87           |             | 3                | 3  | 3     | 18.0 |
| UNT vs. ACT+6AN                   | 59.50      | 45.80              | 13.70            | 8.398       | 3                | 3  |       | 0    |
| ACT vs. ACT+6AN                   | 74.37      | 45.80              | 28.57            | 8.398       | 3                | 3  | 2.504 | 18.0 |
|                                   |            |                    |                  | 8.398       |                  |    | 2.307 | 0    |
|                                   |            |                    |                  |             |                  |    | 4.811 |      |

|  |  |  |  |  |  |  |  |  |      |
|--|--|--|--|--|--|--|--|--|------|
|  |  |  |  |  |  |  |  |  | 18.0 |
|  |  |  |  |  |  |  |  |  | 0    |
|  |  |  |  |  |  |  |  |  | 18.0 |
|  |  |  |  |  |  |  |  |  | 0    |
|  |  |  |  |  |  |  |  |  | 18.0 |
|  |  |  |  |  |  |  |  |  | 0    |

### 2way ANOVA of R5P:ANOVA results

|                              | Data Set-A           | Data Set-B | Data Set-C      | Data Set-D             | Data Set-E |
|------------------------------|----------------------|------------|-----------------|------------------------|------------|
| Table Analyzed               | R5P                  |            |                 |                        |            |
| Two-way ANOVA                | Ordinary             |            |                 |                        |            |
| Alpha                        | 0.05                 |            |                 |                        |            |
| Source of Variation          | % of total variation | P value    | P value summary | Significant?           |            |
| Interaction                  | 19.39                | <0.0001    | ****            | Yes                    |            |
| met_species                  | 77.88                | <0.0001    | ****            | Yes                    |            |
| Tx                           | 6.593e-013           | >0.9999    | ns              | No                     |            |
| ANOVA table                  | SS                   | DF         | MS              | F (DFn, DFd)           | P value    |
| Interaction                  | 2832                 | 4          | 708.1           | F (4, 18) = 31.99      | P<0.0001   |
| met_species                  | 11375                | 2          | 5688            | F (2, 18) = 256.9      | P<0.0001   |
| Tx                           | 9.630e-011           | 2          | 4.815e-011      | F (2, 18) = 2.175e-012 | P>0.9999   |
| Residual                     | 398.4                | 18         | 22.14           |                        |            |
| Data summary                 |                      |            |                 |                        |            |
| Number of columns (Tx)       | 3                    |            |                 |                        |            |
| Number of rows (met_species) | 3                    |            |                 |                        |            |
| Number of values             | 27                   |            |                 |                        |            |

### 2way ANOVA of R5P:Multiple comparisons

|                                                               | Data Set-A | Data Set-B         | Data Set-C       | Data Set-D  | Data Set-E       | Data Set-F | Data Set-G | Data Set-H |
|---------------------------------------------------------------|------------|--------------------|------------------|-------------|------------------|------------|------------|------------|
| Within each row, compare columns (simple effects within rows) |            |                    |                  |             |                  |            |            |            |
| Number of families                                            | 3          |                    |                  |             |                  |            |            |            |
| Number of comparisons per family                              | 3          |                    |                  |             |                  |            |            |            |
| Alpha                                                         | 0.05       |                    |                  |             |                  |            |            |            |
| Tukey's multiple comparisons test                             | Mean Diff. | 95.00% CI of diff. | Below threshold? | Summary     | Adjusted P Value |            |            |            |
| m0                                                            |            |                    |                  |             |                  |            |            |            |
| UNT vs. ACT                                                   | 20.81      | 11.00 to 30.61     | Yes              | ***         | 0.0001           |            |            |            |
| UNT vs. ACT+6AN                                               | -11.96     | -21.76 to -2.154   | Yes              | *           | 0.0158           |            |            |            |
| ACT vs. ACT+6AN                                               | -32.76     | -42.57 to -22.96   | Yes              | ****        | <0.0001          |            |            |            |
| m1                                                            |            |                    |                  |             |                  |            |            |            |
| UNT vs. ACT                                                   | -21.23     | -31.04 to -11.43   | Yes              | ****        | <0.0001          |            |            |            |
| UNT vs. ACT+6AN                                               | 1.827      | -7.977 to 11.63    | No               | ns          | 0.8836           |            |            |            |
| ACT vs. ACT+6AN                                               | 23.06      | 13.26 to 32.86     | Yes              | ****        | <0.0001          |            |            |            |
| m2                                                            |            |                    |                  |             |                  |            |            |            |
| UNT vs. ACT                                                   | 0.4282     | -9.376 to 10.23    | No               | ns          | 0.9932           |            |            |            |
| UNT vs. ACT+6AN                                               | 10.13      | 0.3270 to 19.94    | Yes              | *           | 0.0422           |            |            |            |
| ACT vs. ACT+6AN                                               | 9.703      | -0.1012 to 19.51   | No               | ns          | 0.0527           |            |            |            |
| Test details                                                  | Mean 1     | Mean 2             | Mean Diff.       | SE of diff. | N1               | N2         | q          | DF         |
| m0                                                            |            |                    |                  |             |                  |            |            |            |
| UNT vs. ACT                                                   | 65.16      | 44.35              | 20.81            |             | 3                | 3          | 7.660      | 18.0       |
| UNT vs. ACT+6AN                                               | 65.16      | 77.12              | -11.96           | 3.841       | 3                | 3          | 4.402      | 0          |
| ACT vs. ACT+6AN                                               | 44.35      | 77.12              | -32.76           | 3.841       | 3                |            | 12.06      | 18.0       |
|                                                               |            |                    |                  | 3.841       |                  |            |            | 0          |
|                                                               |            |                    |                  |             |                  |            |            | 18.0       |
| m1                                                            |            |                    |                  |             |                  |            |            |            |
| UNT vs. ACT                                                   | 9.865      | 31.10              | -21.23           |             | 3                | 3          | 7.817      | 0          |
|                                                               |            |                    |                  |             |                  |            | 0.672      |            |

|                 |       |       |        |       |   |   |       |      |
|-----------------|-------|-------|--------|-------|---|---|-------|------|
| UNT vs. ACT+6AN | 9.865 | 8.038 | 1.827  | 3.841 | 3 | 3 | 5     |      |
| ACT vs. ACT+6AN | 31.10 | 8.038 | 23.06  | 3.841 | 3 |   | 8.490 | 18.0 |
|                 |       |       |        | 3.841 |   |   |       | 0    |
| m2              |       |       |        |       |   | 3 |       | 18.0 |
| UNT vs. ACT     | 24.98 | 24.55 | 0.4282 |       | 3 | 3 | 0.157 | 0    |
| UNT vs. ACT+6AN | 24.98 | 14.85 | 10.13  | 3.841 | 3 | 3 | 7     | 18.0 |
| ACT vs. ACT+6AN | 24.55 | 14.85 | 9.703  | 3.841 | 3 |   | 3.730 | 0    |
|                 |       |       |        | 3.841 |   |   | 3.572 |      |
|                 |       |       |        |       |   |   |       | 18.0 |
|                 |       |       |        |       |   |   |       | 0    |
|                 |       |       |        |       |   |   |       | 18.0 |
|                 |       |       |        |       |   |   |       | 0    |
|                 |       |       |        |       |   |   |       | 18.0 |
|                 |       |       |        |       |   |   |       | 0    |

## 2way ANOVA of S7P:ANOVA results

|                     | Data Set-A           | Data Set-B | Data Set-C      | Data Set-D             | Data Set-E |
|---------------------|----------------------|------------|-----------------|------------------------|------------|
| Table Analyzed      | S7P                  |            |                 |                        |            |
| Two-way ANOVA       | Ordinary             |            |                 |                        |            |
| Alpha               | 0.05                 |            |                 |                        |            |
| Source of Variation | % of total variation | P value    | P value summary | Significant?           |            |
| Interaction         | 16.97                | <0.0001    | ****            | Yes                    |            |
| met_species         | 82.55                | <0.0001    | ****            | Yes                    |            |
| Tx                  | 5.756e-012           | >0.9999    | ns              | No                     |            |
| ANOVA table         | SS                   | DF         | MS              | F (DFn, DFd)           | P value    |
| Interaction         | 2140                 | 4          | 535.0           | F (4, 18) = 159.0      | P<0.0001   |
| met_species         | 10412                | 2          | 5206            | F (2, 18) = 1547       | P<0.0001   |
| Tx                  | 7.260e-010           | 2          | 3.630e-010      | F (2, 18) = 1.079e-010 | P>0.9999   |
| Residual            | 60.58                | 18         | 3.365           |                        |            |
| Data summary        |                      |            |                 |                        |            |

|                              |    |  |  |  |  |
|------------------------------|----|--|--|--|--|
| Number of columns (Tx)       | 3  |  |  |  |  |
| Number of rows (met_species) | 3  |  |  |  |  |
| Number of values             | 27 |  |  |  |  |

## 2way ANOVA of S7P:Multiple comparisons

|                                                               | Data Set-A | Data Set-B         | Data Set-C       | Data Set-D | Data Set-E       | Data Set-F | Data Set-G | Data Set-H |
|---------------------------------------------------------------|------------|--------------------|------------------|------------|------------------|------------|------------|------------|
| Within each row, compare columns (simple effects within rows) |            |                    |                  |            |                  |            |            |            |
| Number of families                                            | 3          |                    |                  |            |                  |            |            |            |
| Number of comparisons per family                              | 3          |                    |                  |            |                  |            |            |            |
| Alpha                                                         | 0.05       |                    |                  |            |                  |            |            |            |
| Tukey's multiple comparisons test                             | Mean Diff. | 95.00% CI of diff. | Below threshold? | Summary    | Adjusted P Value |            |            |            |
| m0                                                            |            |                    |                  |            |                  |            |            |            |
| UNT vs. ACT                                                   | 23.86      | 20.04 to 27.68     | Yes              | ****       | <0.0001          |            |            |            |
| UNT vs. ACT+6AN                                               | -4.099     | -7.922 to -0.2761  | Yes              | *          | 0.0345           |            |            |            |
| ACT vs. ACT+6AN                                               | -27.96     | -31.78 to -24.13   | Yes              | ****       | <0.0001          |            |            |            |
| m1                                                            |            |                    |                  |            |                  |            |            |            |
| UNT vs. ACT                                                   | -15.75     |                    | Yes              | ****       | <0.0001          |            |            |            |
| UNT vs. ACT+6AN                                               | 3.486      | -19.57 to -11.93   | No               | ns         | 0.0774           |            |            |            |
| ACT vs. ACT+6AN                                               | 19.24      | -0.3363 to 7.309   | Yes              | ****       | <0.0001          |            |            |            |
| m2                                                            |            |                    |                  |            |                  |            |            |            |
| UNT vs. ACT                                                   | -8.108     |                    | Yes              | ***        | 0.0001           |            |            |            |
| UNT vs. ACT+6AN                                               | 0.6125     | -11.93 to -4.286   | No               | ns         | 0.9124           |            |            |            |
| ACT vs. ACT+6AN                                               | 8.721      | -3.210 to 4.435    | Yes              | ****       | <0.0001          |            |            |            |
| Test details                                                  | Mean 1     |                    | Mean Diff.       | SE of      | N1               | N2         | q          | DF         |

|                 |       |        |        |       |   |   |       |      |      |
|-----------------|-------|--------|--------|-------|---|---|-------|------|------|
| m0              |       | Mean 2 |        | diff. |   |   |       |      |      |
| UNT vs. ACT     | 67.56 |        | 23.86  |       | 3 | 3 | 22.53 | 18.0 |      |
| UNT vs. ACT+6AN | 67.56 | 43.70  | -4.099 | 1.498 | 3 | 3 | 3.870 | 0    |      |
| ACT vs. ACT+6AN | 43.70 | 71.65  | -27.96 | 1.498 | 3 |   | 26.40 | 18.0 |      |
|                 |       | 71.65  |        | 1.498 |   |   |       | 0    | 18.0 |
| m1              |       |        |        |       |   | 3 | 14.87 | 0    |      |
| UNT vs. ACT     | 13.05 |        | -15.75 |       | 3 | 3 | 3.292 |      |      |
| UNT vs. ACT+6AN | 13.05 | 28.80  | 3.486  | 1.498 | 3 | 3 | 18.16 |      |      |
| ACT vs. ACT+6AN | 28.80 | 9.566  | 19.24  | 1.498 | 3 |   |       | 18.0 |      |
|                 |       | 9.566  |        | 1.498 |   |   |       | 0    |      |
| m2              |       |        |        |       |   | 3 | 7.656 | 18.0 |      |
| UNT vs. ACT     | 19.39 |        | -8.108 |       | 3 | 3 | 0.578 | 0    |      |
| UNT vs. ACT+6AN | 19.39 | 27.50  | 0.6125 | 1.498 | 3 | 3 | 3     | 18.0 |      |
| ACT vs. ACT+6AN | 27.50 | 18.78  | 8.721  | 1.498 | 3 |   | 8.234 | 0    |      |
|                 |       | 18.78  |        | 1.498 |   |   |       |      | 18.0 |
|                 |       |        |        |       |   |   |       |      | 0    |
|                 |       |        |        |       |   |   |       |      | 18.0 |
|                 |       |        |        |       |   |   |       |      | 0    |
|                 |       |        |        |       |   |   |       |      | 18.0 |
|                 |       |        |        |       |   |   |       |      | 0    |

## 2way ANOVA of F6P:ANOVA results

|                     | Data Set-A           | Data Set-B | Data Set-C      | Data Set-D   | Data Set-E |
|---------------------|----------------------|------------|-----------------|--------------|------------|
| Table Analyzed      | F6P                  |            |                 |              |            |
| Two-way ANOVA       | Ordinary             |            |                 |              |            |
| Alpha               | 0.05                 |            |                 |              |            |
| Source of Variation | % of total variation | P value    | P value summary | Significant? |            |
| Interaction         | 23.80                | <0.0001    | ****            | Yes          |            |
| met_species         | 70.59                | <0.0001    | ****            | Yes          |            |
| Tx                  | 3.719e-011           | >0.9999    | ns              | No           |            |

|                              |            |    |            |                        |          |
|------------------------------|------------|----|------------|------------------------|----------|
| ANOVA table                  | SS         | DF | MS         | F (DFn, DFd)           | P value  |
| Interaction                  | 1495       | 4  | 373.6      | F (4, 18) = 19.10      | P<0.0001 |
| met_species                  | 4433       | 2  | 2216       | F (2, 18) = 113.3      | P<0.0001 |
| Tx                           | 2.336e-009 | 2  | 1.168e-009 | F (2, 18) = 5.969e-011 | P>0.9999 |
| Residual                     | 352.2      | 18 | 19.57      |                        |          |
| Data summary                 |            |    |            |                        |          |
| Number of columns (Tx)       | 3          |    |            |                        |          |
| Number of rows (met_species) | 3          |    |            |                        |          |
| Number of values             | 27         |    |            |                        |          |

## 2way ANOVA of F6P:Multiple comparisons

|                                                               | Data Set-A | Data Set-B         | Data Set-C       | Data Set-D | Data Set-E       | Data Set-F | Data Set-G | Data Set-H |
|---------------------------------------------------------------|------------|--------------------|------------------|------------|------------------|------------|------------|------------|
| Within each row, compare columns (simple effects within rows) | 3          |                    |                  |            |                  |            |            |            |
| Number of families                                            | 3          |                    |                  |            |                  |            |            |            |
| Number of comparisons per family                              | 0.05       |                    |                  |            |                  |            |            |            |
| Alpha                                                         |            |                    |                  |            |                  |            |            |            |
| Tukey's multiple comparisons test                             | Mean Diff. | 95.00% CI of diff. | Below threshold? | Summary    | Adjusted P Value |            |            |            |
| m0                                                            |            |                    |                  |            |                  |            |            |            |
| UNT vs. ACT                                                   | 15.85      | 6.636 to 25.07     | Yes              | ***        | 0.0010           |            |            |            |
| UNT vs. ACT+6AN                                               | -8.581     | -17.80 to 0.6360   | No               | ns         | 0.0705           |            |            |            |
| ACT vs. ACT+6AN                                               | -24.43     | -33.65 to -15.22   | Yes              | ****       | <0.0001          |            |            |            |
| m1                                                            |            |                    |                  |            |                  |            |            |            |
| UNT vs. ACT                                                   | -13.24     | -22.46 to -4.024   | Yes              | **         | 0.0048           |            |            |            |
| UNT vs. ACT+6AN                                               | 4.220      | -4.997 to 13.44    | No               | ns         | 0.4863           |            |            |            |
| ACT vs. ACT+6AN                                               | 17.46      | 8.244 to 26.68     | Yes              | ***        | 0.0004           |            |            |            |

|                 |        |                 |            |             |        |    |      |      |  |
|-----------------|--------|-----------------|------------|-------------|--------|----|------|------|--|
| m2              |        |                 |            |             |        |    |      |      |  |
| UNT vs. ACT     | -2.612 | -11.83 to 6.606 | No         | ns          | 0.7532 |    |      |      |  |
| UNT vs. ACT+6AN | 4.361  | -4.856 to 13.58 | No         | ns          | 0.4640 |    |      |      |  |
| ACT vs. ACT+6AN | 6.973  | -2.244 to 16.19 | No         | ns          | 0.1589 |    |      |      |  |
| Test details    | Mean 1 | Mean 2          | Mean Diff. | SE of diff. | N1     | N2 | q    | DF   |  |
| m0              |        |                 |            |             |        |    |      |      |  |
| UNT vs. ACT     | 42.01  | 26.16           | 15.85      |             | 3      | 3  | 6.20 | 18.0 |  |
| UNT vs. ACT+6AN | 42.01  | 50.59           | -8.581     | 3.612       | 3      | 3  | 8    | 0    |  |
| ACT vs. ACT+6AN | 26.16  | 50.59           | -24.43     | 3.612       | 3      | 3  | 3.36 | 18.0 |  |
|                 |        |                 |            | 3.612       |        |    | 0    | 0    |  |
|                 |        |                 |            |             |        |    | 9.56 | 18.0 |  |
| m1              |        |                 |            |             |        |    |      |      |  |
| UNT vs. ACT     | 12.47  | 25.71           | -13.24     |             | 3      | 3  | 8    | 0    |  |
| UNT vs. ACT+6AN | 12.47  | 8.250           | 4.220      | 3.612       | 3      | 3  |      |      |  |
| ACT vs. ACT+6AN | 25.71  | 8.250           | 17.46      | 3.612       | 3      |    | 5.18 | 18.0 |  |
|                 |        |                 |            | 3.612       |        |    | 5    | 0    |  |
| m2              |        |                 |            |             |        |    |      |      |  |
| UNT vs. ACT     | 45.52  | 48.13           | -2.612     |             | 3      | 3  | 1.65 | 18.0 |  |
| UNT vs. ACT+6AN | 45.52  | 41.16           | 4.361      | 3.612       | 3      | 3  | 3    | 0    |  |
| ACT vs. ACT+6AN | 48.13  | 41.16           | 6.973      | 3.612       | 3      | 3  | 6.83 | 18.0 |  |
|                 |        |                 |            | 3.612       |        |    | 8    | 0    |  |
|                 |        |                 |            |             |        |    |      |      |  |
|                 |        |                 |            |             |        |    | 1.02 | 18.0 |  |
|                 |        |                 |            |             |        |    | 3    | 0    |  |
|                 |        |                 |            |             |        |    | 1.70 | 18.0 |  |
|                 |        |                 |            |             |        |    | 8    | 0    |  |
|                 |        |                 |            |             |        |    | 2.73 | 18.0 |  |
|                 |        |                 |            |             |        |    | 0    | 0    |  |

## 2way ANOVA of Ru5P:ANOVA results

|  | Data Set-A | Data Set-B | Data Set-C | Data Set-D | Data Set-E |
|--|------------|------------|------------|------------|------------|
|--|------------|------------|------------|------------|------------|

|                              |                      |         |                 |                        |          |
|------------------------------|----------------------|---------|-----------------|------------------------|----------|
| Table Analyzed               | Ru5P                 |         |                 |                        |          |
| Two-way ANOVA Alpha          | Ordinary<br>0.05     |         |                 |                        |          |
| Source of Variation          | % of total variation | P value | P value summary | Significant?           |          |
| Interaction                  | 6.705                | <0.0001 | ****            | Yes                    |          |
| met_species                  | 93.23                | <0.0001 | ****            | Yes                    |          |
| Tx                           | 2.767e-012           | >0.9999 | ns              | No                     |          |
| ANOVA table                  | SS                   | DF      | MS              | F (DFn, DFd)           | P value  |
| Interaction                  | 2325                 | 4       | 581.2           | F (4, 18) = 433.0      | P<0.0001 |
| met_species                  | 32325                | 2       | 16163           | F (2, 18) = 12041      | P<0.0001 |
| Tx                           | 9.593e-010           | 2       | 4.796e-010      | F (2, 18) = 3.573e-010 | P>0.9999 |
| Residual                     | 24.16                | 18      | 1.342           |                        |          |
| Data summary                 |                      |         |                 |                        |          |
| Number of columns (Tx)       | 3                    |         |                 |                        |          |
| Number of rows (met_species) | 3                    |         |                 |                        |          |
| Number of values             | 27                   |         |                 |                        |          |

## 2way ANOVA of Ru5P: Multiple comparisons

|                                                               | Data Set-A | Data Set-B         | Data Set-C       | Data Set-D | Data Set-E       | Data Set-F | Data Set-G | Data Set-H |
|---------------------------------------------------------------|------------|--------------------|------------------|------------|------------------|------------|------------|------------|
| Within each row, compare columns (simple effects within rows) |            |                    |                  |            |                  |            |            |            |
| Number of families                                            | 3          |                    |                  |            |                  |            |            |            |
| Number of comparisons per family                              | 3          |                    |                  |            |                  |            |            |            |
| Alpha                                                         | 0.05       |                    |                  |            |                  |            |            |            |
| Tukey's multiple comparisons test                             | Mean Diff. | 95.00% CI of diff. | Below threshold? | Summary    | Adjusted P Value |            |            |            |

|                 |        |                            |            |             |         |    |      |      |  |
|-----------------|--------|----------------------------|------------|-------------|---------|----|------|------|--|
| m0              |        |                            |            |             |         |    |      |      |  |
| UNT vs. ACT     | 26.06  | 23.65 to 28.48             | Yes        | ****        | <0.0001 |    |      |      |  |
| UNT vs. ACT+6AN | 0.9401 | -1.474 to 3.354            | No         | ns          | 0.5900  |    |      |      |  |
| ACT vs. ACT+6AN | -25.12 | -27.54 to -22.71           | Yes        | ****        | <0.0001 |    |      |      |  |
| m1              |        |                            |            |             |         |    |      |      |  |
| UNT vs. ACT     | -21.27 | -23.68 to -18.85           | Yes        | ****        | <0.0001 |    |      |      |  |
| UNT vs. ACT+6AN | 1.621  | -0.7931 to 4.035           | No         | ns          | 0.2274  |    |      |      |  |
| ACT vs. ACT+6AN | 22.89  | 20.48 to 25.30             | Yes        | ****        | <0.0001 |    |      |      |  |
| m2              |        |                            |            |             |         |    |      |      |  |
| UNT vs. ACT     | -4.794 | -7.208 to -2.379           | Yes        | ***         | 0.0002  |    |      |      |  |
| UNT vs. ACT+6AN | -2.561 | -4.976 to -                | Yes        | *           | 0.0366  |    |      |      |  |
| ACT vs. ACT+6AN | 2.232  | 0.1470<br>-0.1820 to 4.647 | No         | ns          | 0.0728  |    |      |      |  |
| Test details    | Mean 1 | Mean 2                     | Mean Diff. | SE of diff. | N1      | N2 | q    | DF   |  |
| m0              |        |                            |            |             |         |    |      |      |  |
| UNT vs. ACT     | 90.94  |                            | 26.06      |             | 3       | 3  | 38.9 | 18.0 |  |
| UNT vs. ACT+6AN | 90.94  | 64.88                      | 0.9401     | 0.9460      | 3       | 3  | 6    | 0    |  |
| ACT vs. ACT+6AN | 64.88  | 90.00                      | -25.12     | 0.9460      | 3       | 3  | 1.40 | 18.0 |  |
|                 |        | 90.00                      |            | 0.9460      |         |    | 5    | 0    |  |
|                 |        |                            |            |             |         |    | 37.5 | 18.0 |  |
| m1              |        |                            |            |             |         |    | 6    | 0    |  |
| UNT vs. ACT     | 7.392  |                            | -21.27     |             | 3       | 3  |      |      |  |
| UNT vs. ACT+6AN | 7.392  | 28.66                      | 1.621      | 0.9460      | 3       | 3  |      |      |  |
| ACT vs. ACT+6AN | 28.66  | 5.771                      | 22.89      | 0.9460      | 3       |    | 31.8 | 18.0 |  |
|                 |        | 5.771                      |            | 0.9460      |         |    | 0    | 0    |  |
| m2              |        |                            |            |             |         |    |      |      |  |
| UNT vs. ACT     | 1.670  |                            | -4.794     |             | 3       | 3  | 2.42 | 18.0 |  |
| UNT vs. ACT+6AN | 1.670  | 6.464                      | -2.561     | 0.9460      | 3       | 3  | 4    | 0    |  |
| ACT vs. ACT+6AN | 6.464  | 4.232                      | 2.232      | 0.9460      | 3       | 3  | 34.2 | 18.0 |  |
|                 |        | 4.232                      |            | 0.9460      |         |    | 2    | 0    |  |
|                 |        |                            |            |             |         |    | 7.16 | 18.0 |  |
|                 |        |                            |            |             |         |    | 6    | 0    |  |
|                 |        |                            |            |             |         |    | 3.82 | 18.0 |  |
|                 |        |                            |            |             |         |    | 9    | 0    |  |



| Within each row, compare columns (simple effects within rows) |            |                    |                  |             |                  |    |      |      |
|---------------------------------------------------------------|------------|--------------------|------------------|-------------|------------------|----|------|------|
| Number of families                                            | 3          |                    |                  |             |                  |    |      |      |
| Number of comparisons per family                              | 3          |                    |                  |             |                  |    |      |      |
| Alpha                                                         | 0.05       |                    |                  |             |                  |    |      |      |
| Tukey's multiple comparisons test                             | Mean Diff. | 95.00% CI of diff. | Below threshold? | Summary     | Adjusted P Value |    |      |      |
| m0                                                            |            |                    |                  |             |                  |    |      |      |
| UNT vs. ACT                                                   | 1.516      | -0.5061 to 3.537   | No               | ns          | 0.1637           |    |      |      |
| UNT vs. ACT+6AN                                               | -3.427     | -5.449 to -1.406   | Yes              | **          | 0.0011           |    |      |      |
| ACT vs. ACT+6AN                                               | -4.943     | -6.965 to -2.921   | Yes              | ****        | <0.0001          |    |      |      |
| m1                                                            |            |                    |                  |             |                  |    |      |      |
| UNT vs. ACT                                                   | -1.516     | -3.537 to 0.5061   | No               | ns          | 0.1637           |    |      |      |
| UNT vs. ACT+6AN                                               | 3.427      | 1.406 to 5.449     | Yes              | **          | 0.0011           |    |      |      |
| ACT vs. ACT+6AN                                               | 4.943      | 2.921 to 6.965     | Yes              | ****        | <0.0001          |    |      |      |
| m2                                                            |            |                    |                  |             |                  |    |      |      |
| UNT vs. ACT                                                   | 0.000      | -2.022 to 2.022    | No               | ns          | >0.9999          |    |      |      |
| UNT vs. ACT+6AN                                               | 0.000      | -2.022 to 2.022    | No               | ns          | >0.9999          |    |      |      |
| ACT vs. ACT+6AN                                               | 0.000      | -2.022 to 2.022    | No               | ns          | >0.9999          |    |      |      |
| Test details                                                  | Mean 1     | Mean 2             | Mean Diff.       | SE of diff. | N1               | N2 | q    | DF   |
| m0                                                            |            |                    |                  |             |                  |    |      |      |
| UNT vs. ACT                                                   | 95.45      | 93.93              | 1.516            |             | 3                | 3  | 2.70 | 18.0 |
| UNT vs. ACT+6AN                                               | 95.45      | 98.87              | -3.427           | 0.7922      | 3                | 3  | 6.11 | 18.0 |
| ACT vs. ACT+6AN                                               | 93.93      | 98.87              | -4.943           | 0.7922      | 3                |    | 9.0  | 18.0 |
|                                                               |            |                    |                  | 0.7922      |                  |    | 8.82 | 18.0 |
| m1                                                            |            |                    |                  |             |                  |    |      |      |
| UNT vs. ACT                                                   | 4.555      | 6.070              | -1.516           |             | 3                | 3  | 5.0  | 18.0 |
| UNT vs. ACT+6AN                                               | 4.555      | 1.127              | 3.427            | 0.7922      | 3                | 3  |      |      |
| ACT vs. ACT+6AN                                               | 6.070      | 1.127              | 4.943            | 0.7922      | 3                |    | 2.70 | 18.0 |
|                                                               |            |                    |                  | 0.7922      |                  |    | 6.0  | 18.0 |
| m2                                                            |            |                    |                  |             |                  |    |      |      |
|                                                               |            |                    |                  |             |                  | 3  | 6.11 | 18.0 |

|                 |       |       |       |        |   |   |      |      |
|-----------------|-------|-------|-------|--------|---|---|------|------|
| UNT vs. ACT     | 0.000 | 0.000 | 0.000 |        | 3 | 3 | 9    | 0    |
| UNT vs. ACT+6AN | 0.000 | 0.000 | 0.000 | 0.7922 | 3 | 3 | 8.82 | 18.0 |
| ACT vs. ACT+6AN | 0.000 | 0.000 | 0.000 | 0.7922 | 3 |   | 5    | 0    |
|                 |       |       |       | 0.7922 |   |   |      |      |
|                 |       |       |       |        |   |   | 0.00 | 18.0 |
|                 |       |       |       |        |   |   | 0    | 0    |
|                 |       |       |       |        |   |   | 0.00 | 18.0 |
|                 |       |       |       |        |   |   | 0    | 0    |
|                 |       |       |       |        |   |   | 0.00 | 18.0 |
|                 |       |       |       |        |   |   | 0    | 0    |

## 2way ANOVA of X5P:ANOVA results

|                              | Data Set-A           | Data Set-B | Data Set-C      | Data Set-D             | Data Set-E |
|------------------------------|----------------------|------------|-----------------|------------------------|------------|
| Table Analyzed               | X5P                  |            |                 |                        |            |
| Two-way ANOVA<br>Alpha       | Ordinary<br>0.05     |            |                 |                        |            |
| Source of Variation          | % of total variation | P value    | P value summary | Significant?           |            |
| Interaction                  | 9.438                | <0.0001    | ****            | Yes                    |            |
| met_species                  | 90.55                | <0.0001    | ****            | Yes                    |            |
| Tx                           | 4.669e-014           | >0.9999    | ns              | No                     |            |
| ANOVA table                  | SS                   | DF         | MS              | F (DFn, DFd)           | P value    |
| Interaction                  | 3369                 | 4          | 842.3           | F (4, 18) = 4153       | P<0.0001   |
| met_species                  | 32326                | 2          | 16163           | F (2, 18) = 79695      | P<0.0001   |
| Tx                           | 1.667e-011           | 2          | 8.333e-012      | F (2, 18) = 4.109e-011 | P>0.9999   |
| Residual                     | 3.651                | 18         | 0.2028          |                        |            |
| Data summary                 |                      |            |                 |                        |            |
| Number of columns (Tx)       | 3                    |            |                 |                        |            |
| Number of rows (met_species) | 3                    |            |                 |                        |            |
| Number of values             | 27                   |            |                 |                        |            |

**2way ANOVA of X5P:Multiple comparisons**

|                                                               | Data Set-A | Data Set-B         | Data Set-C       | Data Set-D  | Data Set-E       | Data Set-F | Data Set-G | Data Set-H |
|---------------------------------------------------------------|------------|--------------------|------------------|-------------|------------------|------------|------------|------------|
| Within each row, compare columns (simple effects within rows) |            |                    |                  |             |                  |            |            |            |
| Number of families                                            | 3          |                    |                  |             |                  |            |            |            |
| Number of comparisons per family                              | 3          |                    |                  |             |                  |            |            |            |
| Alpha                                                         | 0.05       |                    |                  |             |                  |            |            |            |
| Tukey's multiple comparisons test                             | Mean Diff. | 95.00% CI of diff. | Below threshold? | Summary     | Adjusted P Value |            |            |            |
| m0                                                            |            |                    |                  |             |                  |            |            |            |
| UNT vs. ACT                                                   | 26.33      | 25.39 to 27.27     | Yes              | ****        | <0.0001          |            |            |            |
| UNT vs. ACT+6AN                                               | -4.789     | -5.727 to -3.850   | Yes              | ****        | <0.0001          |            |            |            |
| ACT vs. ACT+6AN                                               | -31.12     | -32.06 to -30.18   | Yes              | ****        | <0.0001          |            |            |            |
| m1                                                            |            |                    |                  |             |                  |            |            |            |
| UNT vs. ACT                                                   | -26.33     | -27.27 to -25.39   | Yes              | ****        | <0.0001          |            |            |            |
| UNT vs. ACT+6AN                                               | 4.789      | 3.850 to 5.727     | Yes              | ****        | <0.0001          |            |            |            |
| ACT vs. ACT+6AN                                               | 31.12      | 30.18 to 32.06     | Yes              | ****        | <0.0001          |            |            |            |
| m2                                                            |            |                    |                  |             |                  |            |            |            |
| UNT vs. ACT                                                   | 0.000      | -0.9385 to 0.9385  | No               | ns          | >0.9999          |            |            |            |
| UNT vs. ACT+6AN                                               | 0.000      | 0.9385 to -0.9385  | No               | ns          | >0.9999          |            |            |            |
| ACT vs. ACT+6AN                                               | 0.000      | -0.9385 to 0.9385  | No               | ns          | >0.9999          |            |            |            |
| Test details                                                  | Mean 1     | 0.9385             | Mean Diff.       | SE of diff. | N1               | N2         | q          | DF         |
| m0                                                            |            |                    |                  |             |                  |            |            |            |
| UNT vs. ACT                                                   | 88.21      | Mean 2             | 26.33            |             | 3                | 3          | 101.       | 18.0       |
| UNT vs. ACT+6AN                                               | 88.21      |                    | -4.789           | 0.3677      | 3                | 3          | 18.4       | 18.0       |
| ACT vs. ACT+6AN                                               | 61.88      |                    | -31.12           | 0.3677      | 3                | 2          |            | 0          |

|                 |       |       |        |        |   |   |      |      |
|-----------------|-------|-------|--------|--------|---|---|------|------|
| m1              |       | 61.88 |        | 0.3677 |   |   | 119. | 18.0 |
| UNT vs. ACT     | 11.79 | 92.99 | -26.33 |        | 3 | 3 | 7    | 0    |
| UNT vs. ACT+6AN | 11.79 | 92.99 | 4.789  | 0.3677 | 3 | 3 |      |      |
| ACT vs. ACT+6AN | 38.12 |       | 31.12  | 0.3677 | 3 |   | 101. | 18.0 |
|                 |       | 38.12 |        | 0.3677 |   |   | 3    | 0    |
| m2              |       | 7.005 |        |        |   | 3 | 18.4 | 18.0 |
| UNT vs. ACT     | 0.000 | 7.005 | 0.000  |        | 3 | 3 | 2    | 0    |
| UNT vs. ACT+6AN | 0.000 |       | 0.000  | 0.3677 | 3 | 3 | 119. | 18.0 |
| ACT vs. ACT+6AN | 0.000 |       | 0.000  | 0.3677 | 3 |   | 7    | 0    |
|                 |       | 0.000 |        | 0.3677 |   |   |      |      |
|                 |       | 0.000 |        |        |   |   |      |      |
|                 |       | 0.000 |        |        |   |   | 0.00 | 18.0 |
|                 |       |       |        |        |   |   | 0    | 0    |
|                 |       |       |        |        |   |   | 0.00 | 18.0 |
|                 |       |       |        |        |   |   | 0    | 0    |
|                 |       |       |        |        |   |   | 0.00 | 18.0 |
|                 |       |       |        |        |   |   | 0    | 0    |

## 2way ANOVA of DHAP:ANOVA results

|                        | Data Set-A           | Data Set-B | Data Set-C      | Data Set-D             | Data Set-E |
|------------------------|----------------------|------------|-----------------|------------------------|------------|
| Table Analyzed         | DHAP                 |            |                 |                        |            |
| Two-way ANOVA<br>Alpha | Ordinary<br>0.05     |            |                 |                        |            |
| Source of Variation    | % of total variation | P value    | P value summary | Significant?           |            |
| Interaction            | 0.06549              | <0.0001    | ****            | Yes                    |            |
| met_species            | 99.93                | <0.0001    | ****            | Yes                    |            |
| Tx                     | 4.668e-013           | >0.9999    | ns              | No                     |            |
| ANOVA table            | SS                   | DF         | MS              | F (DFn, DFd)           | P value    |
| Interaction            | 34.08                | 4          | 8.519           | F (4, 18) = 85.39      | P<0.0001   |
| met_species            | 51999                | 2          | 25999           | F (2, 18) = 260621     | P<0.0001   |
| Tx                     | 2.429e-010           |            |                 | F (2, 18) = 1.217e-009 | P>0.9999   |

|                              |       |         |                       |  |  |
|------------------------------|-------|---------|-----------------------|--|--|
| Residual                     | 1.796 | 2<br>18 | 1.214e-010<br>0.09976 |  |  |
| Data summary                 |       |         |                       |  |  |
| Number of columns (Tx)       | 3     |         |                       |  |  |
| Number of rows (met_species) | 3     |         |                       |  |  |
| Number of values             | 27    |         |                       |  |  |

## 2way ANOVA of DHAP:Multiple comparisons

|                                                               | Data Set-A | Data Set-B                        | Data Set-C       | Data Set-D | Data Set-E       | Data Set-F | Data Set-G | Data Set-H |
|---------------------------------------------------------------|------------|-----------------------------------|------------------|------------|------------------|------------|------------|------------|
| Within each row, compare columns (simple effects within rows) |            |                                   |                  |            |                  |            |            |            |
| Number of families                                            | 3          |                                   |                  |            |                  |            |            |            |
| Number of comparisons per family                              | 3          |                                   |                  |            |                  |            |            |            |
| Alpha                                                         | 0.05       |                                   |                  |            |                  |            |            |            |
| Tukey's multiple comparisons test                             | Mean Diff. | 95.00% CI of diff.                | Below threshold? | Summary    | Adjusted P Value |            |            |            |
| m0                                                            |            |                                   |                  |            |                  |            |            |            |
| UNT vs. ACT                                                   | 2.356      | 1.698 to 3.014                    | Yes              | ****       | <0.0001          |            |            |            |
| UNT vs. ACT+6AN                                               | -0.9090    | -1.567 to -                       | Yes              | **         | 0.0065           |            |            |            |
| ACT vs. ACT+6AN                                               | -3.265     | 0.2508<br>-3.923 to -2.607        | Yes              | ****       | <0.0001          |            |            |            |
| m1                                                            |            |                                   |                  |            |                  |            |            |            |
| UNT vs. ACT                                                   | -2.356     |                                   | Yes              | ****       | <0.0001          |            |            |            |
| UNT vs. ACT+6AN                                               | 0.9090     | -3.014 to -1.698                  | Yes              | **         | 0.0065           |            |            |            |
| ACT vs. ACT+6AN                                               | 3.265      | 0.2509 to 1.567<br>2.607 to 3.923 | Yes              | ****       | <0.0001          |            |            |            |
| m2                                                            |            |                                   |                  |            |                  |            |            |            |
| UNT vs. ACT                                                   | 0.000      |                                   | No               | ns         | >0.9999          |            |            |            |
| UNT vs. ACT+6AN                                               | 0.000      | -0.6582 to                        | No               | ns         | >0.9999          |            |            |            |
| ACT vs. ACT+6AN                                               | 0.000      | 0.6582                            | No               | ns         | >0.9999          |            |            |            |

| Test details    | Mean 1 | -0.6582 to<br>0.6582<br>-0.6582 to<br>0.6582 | Mean Diff. | SE of<br>diff. | N1 | N2 | q    | DF   |
|-----------------|--------|----------------------------------------------|------------|----------------|----|----|------|------|
| m0              |        |                                              |            |                |    | 3  | 12.9 | 18.0 |
| UNT vs. ACT     | 95.82  |                                              | 2.356      |                | 3  | 3  | 2    | 0    |
| UNT vs. ACT+6AN | 95.82  | Mean 2                                       | -0.9090    | 0.2579         | 3  | 3  | 4.98 | 18.0 |
| ACT vs. ACT+6AN | 93.46  |                                              | -3.265     | 0.2579         | 3  |    | 5    | 0    |
|                 |        |                                              |            | 0.2579         |    |    | 17.9 | 18.0 |
| m1              |        | 93.46                                        |            |                |    | 3  | 0    | 0    |
| UNT vs. ACT     | 4.180  | 96.73                                        | -2.356     |                | 3  | 3  |      |      |
| UNT vs. ACT+6AN | 4.180  | 96.73                                        | 0.9090     | 0.2579         | 3  | 3  |      |      |
| ACT vs. ACT+6AN | 6.536  |                                              | 3.265      | 0.2579         | 3  |    | 12.9 | 18.0 |
|                 |        |                                              |            | 0.2579         |    |    | 2    | 0    |
| m2              |        | 6.536                                        |            |                |    | 3  | 4.98 | 18.0 |
| UNT vs. ACT     | 0.000  | 3.271                                        | 0.000      |                | 3  | 3  | 5    | 0    |
| UNT vs. ACT+6AN | 0.000  | 3.271                                        | 0.000      | 0.2579         | 3  | 3  | 17.9 | 18.0 |
| ACT vs. ACT+6AN | 0.000  |                                              | 0.000      | 0.2579         | 3  |    | 0    | 0    |
|                 |        |                                              |            | 0.2579         |    |    |      |      |
|                 |        | 0.000                                        |            |                |    |    | 0.00 | 18.0 |
|                 |        | 0.000                                        |            |                |    |    | 0    | 0    |
|                 |        | 0.000                                        |            |                |    |    | 0.00 | 18.0 |
|                 |        |                                              |            |                |    |    | 0    | 0    |
|                 |        |                                              |            |                |    |    | 0.00 | 18.0 |
|                 |        |                                              |            |                |    |    | 0    | 0    |

## 2way ANOVA of 6PG:ANOVA results

|                        | Data Set-A           | Data Set-B | Data Set-C      | Data Set-D   | Data Set-E |
|------------------------|----------------------|------------|-----------------|--------------|------------|
| Table Analyzed         | 6PG                  |            |                 |              |            |
| Two-way ANOVA<br>Alpha | Ordinary<br>0.05     |            |                 |              |            |
| Source of Variation    | % of total variation | P value    | P value summary | Significant? |            |





## 2way ANOVA of 2PG:ANOVA results

|                              | Data Set-A           | Data Set-B | Data Set-C      | Data Set-D             | Data Set-E |
|------------------------------|----------------------|------------|-----------------|------------------------|------------|
| Table Analyzed               | 2PG                  |            |                 |                        |            |
| Two-way ANOVA<br>Alpha       | Ordinary<br>0.05     |            |                 |                        |            |
| Source of Variation          | % of total variation | P value    | P value summary | Significant?           |            |
| Interaction                  | 0.04672              | 0.0002     | ***             | Yes                    |            |
| met_species                  | 99.93                | <0.0001    | ****            | Yes                    |            |
| Tx                           | 6.059e-013           | >0.9999    | ns              | No                     |            |
| ANOVA table                  | SS                   | DF         | MS              | F (DFn, DFd)           | P value    |
| Interaction                  | 23.00                | 4          | 5.749           | F (4, 18) = 10.28      | P=0.0002   |
| met_species                  | 49185                | 2          | 24593           | F (2, 18) = 43970      | P<0.0001   |
| Tx                           | 2.982e-010           | 2          | 1.491e-010      | F (2, 18) = 2.666e-010 | P>0.9999   |
| Residual                     | 10.07                | 18         | 0.5593          |                        |            |
| Data summary                 |                      |            |                 |                        |            |
| Number of columns (Tx)       | 3                    |            |                 |                        |            |
| Number of rows (met_species) | 3                    |            |                 |                        |            |
| Number of values             | 27                   |            |                 |                        |            |

## 2way ANOVA of 2PG:Multiple comparisons

|                                                               | Data Set-A | Data Set-B | Data Set-C | Data Set-D | Data Set-E | Data Set-F | Data Set-G | Data Set-H |
|---------------------------------------------------------------|------------|------------|------------|------------|------------|------------|------------|------------|
| Within each row, compare columns (simple effects within rows) |            |            |            |            |            |            |            |            |
| Number of families                                            | 3          |            |            |            |            |            |            |            |
| Number of comparisons per family                              | 3          |            |            |            |            |            |            |            |
| Alpha                                                         | 0.05       |            |            |            |            |            |            |            |



|  |  |  |  |  |  |  |  |      |
|--|--|--|--|--|--|--|--|------|
|  |  |  |  |  |  |  |  | 0    |
|  |  |  |  |  |  |  |  | 18.0 |
|  |  |  |  |  |  |  |  | 0    |
|  |  |  |  |  |  |  |  | 18.0 |
|  |  |  |  |  |  |  |  | 0    |

### 2way ANOVA of Lactate:ANOVA results

|                              | Data Set-A           | Data Set-B | Data Set-C      | Data Set-D             | Data Set-E |
|------------------------------|----------------------|------------|-----------------|------------------------|------------|
| Table Analyzed               | Lactate              |            |                 |                        |            |
| Two-way ANOVA<br>Alpha       | Ordinary<br>0.05     |            |                 |                        |            |
| Source of Variation          | % of total variation | P value    | P value summary | Significant?           |            |
| Interaction                  | 1.878                | <0.0001    | ****            | Yes                    |            |
| met_species                  | 98.03                | <0.0001    | ****            | Yes                    |            |
| Tx                           | 3.275e-012           | >0.9999    | ns              | No                     |            |
| ANOVA table                  | SS                   | DF         | MS              | F (DFn, DFd)           | P value    |
| Interaction                  | 582.4                | 6          | 97.07           | F (6, 24) = 79.79      | P<0.0001   |
| met_species                  | 30407                | 3          | 10136           | F (3, 24) = 8331       | P<0.0001   |
| Tx                           | 1.016e-009           | 2          | 5.079e-010      | F (2, 24) = 4.175e-010 | P>0.9999   |
| Residual                     | 29.20                | 24         | 1.217           |                        |            |
| Data summary                 |                      |            |                 |                        |            |
| Number of columns (Tx)       | 3                    |            |                 |                        |            |
| Number of rows (met_species) | 4                    |            |                 |                        |            |
| Number of values             | 36                   |            |                 |                        |            |

### 2way ANOVA of Lactate:Multiple comparisons

|                                                               | Data Set-A | Data Set-B         | Data Set-C       | Data Set-D  | Data Set-E       | Data Set-F | Data Set-G | Data Set-H |
|---------------------------------------------------------------|------------|--------------------|------------------|-------------|------------------|------------|------------|------------|
| Within each row, compare columns (simple effects within rows) |            |                    |                  |             |                  |            |            |            |
| Number of families                                            | 4          |                    |                  |             |                  |            |            |            |
| Number of comparisons per family                              | 3          |                    |                  |             |                  |            |            |            |
| Alpha                                                         | 0.05       |                    |                  |             |                  |            |            |            |
| Tukey's multiple comparisons test                             | Mean Diff. | 95.00% CI of diff. | Below threshold? | Summary     | Adjusted P Value |            |            |            |
| m0                                                            |            |                    |                  |             |                  |            |            |            |
| UNT vs. ACT                                                   | 7.084      | 4.835 to 9.333     | Yes              | ****        | <0.0001          |            |            |            |
| UNT vs. ACT+6AN                                               | -8.068     | -10.32 to -5.819   | Yes              | ****        | <0.0001          |            |            |            |
| ACT vs. ACT+6AN                                               | -15.15     | -17.40 to -12.90   | Yes              | ****        | <0.0001          |            |            |            |
| m1                                                            |            |                    |                  |             |                  |            |            |            |
| UNT vs. ACT                                                   | -1.156     | -3.405 to 1.093    | No               | ns          | 0.4180           |            |            |            |
| UNT vs. ACT+6AN                                               | 0.5559     | -1.693 to 2.805    | No               | ns          | 0.8122           |            |            |            |
| ACT vs. ACT+6AN                                               | 1.712      | -0.5375 to 3.961   | No               | ns          | 0.1603           |            |            |            |
| m2                                                            |            |                    |                  |             |                  |            |            |            |
| UNT vs. ACT                                                   | -5.630     | -7.879 to -3.381   | Yes              | ****        | <0.0001          |            |            |            |
| UNT vs. ACT+6AN                                               | 6.770      | 4.521 to 9.019     | Yes              | ****        | <0.0001          |            |            |            |
| ACT vs. ACT+6AN                                               | 12.40      | 10.15 to 14.65     | Yes              | ****        | <0.0001          |            |            |            |
| m3                                                            |            |                    |                  |             |                  |            |            |            |
| UNT vs. ACT                                                   | -0.2985    | -2.548 to 1.951    | No               | ns          | 0.9414           |            |            |            |
| UNT vs. ACT+6AN                                               | 0.7415     | -1.508 to 2.991    | No               | ns          | 0.6925           |            |            |            |
| ACT vs. ACT+6AN                                               | 1.040      | -1.209 to 3.289    | No               | ns          | 0.4908           |            |            |            |
| Test details                                                  | Mean 1     | Mean 2             | Mean Diff.       | SE of diff. | N1               | N2         | q          | DF         |
| m0                                                            |            |                    |                  |             |                  |            |            |            |
| UNT vs. ACT                                                   | 72.78      | 65.69              | 7.084            |             | 3                | 3          | 11.12      | 24.0       |
|                                                               |            |                    |                  |             |                  |            | 12.67      | 0          |

|                 |       |        |         |        |   |   |       |      |
|-----------------|-------|--------|---------|--------|---|---|-------|------|
| UNT vs. ACT+6AN | 72.78 | 80.84  | -8.068  | 0.9006 | 3 | 3 | 23.79 | 24.0 |
| ACT vs. ACT+6AN | 65.69 | 80.84  | -15.15  | 0.9006 | 3 |   |       | 0    |
|                 |       |        |         | 0.9006 |   |   |       | 24.0 |
| m1              |       |        |         |        |   | 3 | 1.815 | 0    |
| UNT vs. ACT     | 1.224 | 2.380  | -1.156  |        | 3 | 3 | 0.872 |      |
| UNT vs. ACT+6AN | 1.224 | 0.6683 | 0.5559  | 0.9006 | 3 | 3 | 9     |      |
| ACT vs. ACT+6AN | 2.380 | 0.6683 | 1.712   | 0.9006 | 3 |   | 2.688 | 24.0 |
|                 |       |        |         | 0.9006 |   |   |       | 0    |
| m2              |       |        |         |        |   | 3 |       | 24.0 |
| UNT vs. ACT     | 23.31 | 28.94  | -5.630  |        | 3 | 3 | 8.840 | 0    |
| UNT vs. ACT+6AN | 23.31 | 16.54  | 6.770   | 0.9006 | 3 | 3 | 10.63 | 24.0 |
| ACT vs. ACT+6AN | 28.94 | 16.54  | 12.40   | 0.9006 | 3 |   | 19.47 | 0    |
|                 |       |        |         | 0.9006 |   |   |       |      |
| m3              |       |        |         |        |   | 3 |       |      |
| UNT vs. ACT     | 2.688 | 2.987  | -0.2985 |        | 3 | 3 | 0.468 | 24.0 |
| UNT vs. ACT+6AN | 2.688 | 1.947  | 0.7415  | 0.9006 | 3 | 3 | 8     | 0    |
| ACT vs. ACT+6AN | 2.987 | 1.947  | 1.040   | 0.9006 | 3 |   | 1.164 | 24.0 |
|                 |       |        |         | 0.9006 |   |   | 1.633 | 0    |
|                 |       |        |         |        |   |   |       | 24.0 |
|                 |       |        |         |        |   |   |       | 0    |
|                 |       |        |         |        |   |   |       | 24.0 |
|                 |       |        |         |        |   |   |       | 0    |
|                 |       |        |         |        |   |   |       | 24.0 |
|                 |       |        |         |        |   |   |       | 0    |

### Ordinary one-way ANOVA of Pentose Cycle Activity: ANOVA results

|                    | Data Set-A             | Data Set-B | Data Set-C | Data Set-D | Data Set-E |
|--------------------|------------------------|------------|------------|------------|------------|
| Table Analyzed     | Pentose Cycle Activity |            |            |            |            |
| Data sets analyzed | A-C                    |            |            |            |            |
| ANOVA summary      |                        |            |            |            |            |

|                                             |               |         |             |                                  |                     |
|---------------------------------------------|---------------|---------|-------------|----------------------------------|---------------------|
| F                                           | 29.04         |         |             |                                  |                     |
| P value                                     | 0.0008        |         |             |                                  |                     |
| P value summary                             | ***           |         |             |                                  |                     |
| Significant diff. among means (P < 0.05)?   | Yes           |         |             |                                  |                     |
| R squared                                   | 0.9064        |         |             |                                  |                     |
| Brown-Forsythe test                         |               |         |             |                                  |                     |
| F (DFn, DFd)                                | 0.1747 (2, 6) |         |             |                                  |                     |
| P value                                     | 0.8439        |         |             |                                  |                     |
| P value summary                             | ns            |         |             |                                  |                     |
| Are SDs significantly different (P < 0.05)? | No            |         |             |                                  |                     |
| Bartlett's test                             |               |         |             |                                  |                     |
| Bartlett's statistic (corrected)            |               |         |             |                                  |                     |
| P value                                     |               |         |             |                                  |                     |
| P value summary                             |               |         |             |                                  |                     |
| Are SDs significantly different (P < 0.05)? |               |         |             |                                  |                     |
| ANOVA table                                 |               |         |             |                                  |                     |
| Treatment (between columns)                 | SS<br>2.813   | DF<br>2 | MS<br>1.406 | F (DFn, DFd)<br>F (2, 6) = 29.04 | P value<br>P=0.0008 |
| Residual (within columns)                   | 0.2906        | 6       | 0.04843     |                                  |                     |
| Total                                       | 3.103         | 8       |             |                                  |                     |
| Data summary                                |               |         |             |                                  |                     |
| Number of treatments (columns)              | 3             |         |             |                                  |                     |
| Number of values (total)                    | 9             |         |             |                                  |                     |

**Ordinary one-way ANOVA of Pentose Cycle Activity: Multiple comparisons**

|                                   | Data Set-A | Data Set-B         | Data Set-C       | Data Set-D | Data Set-E       | Data Set-F | Data Set-G | Data Set-H |
|-----------------------------------|------------|--------------------|------------------|------------|------------------|------------|------------|------------|
| Number of families                | 1          |                    |                  |            |                  |            |            |            |
| Number of comparisons per family  | 3          |                    |                  |            |                  |            |            |            |
| Alpha                             | 0.05       |                    |                  |            |                  |            |            |            |
| Tukey's multiple comparisons test | Mean Diff. | 95.00% CI of diff. | Below threshold? | Summary    | Adjusted P Value |            |            |            |

|                        |         |                   |            |             |        |     |       |    |
|------------------------|---------|-------------------|------------|-------------|--------|-----|-------|----|
| UNT vs. ACT            | -0.9556 | -1.507 to -0.4042 | Yes        | **          | 0.0043 | A-B |       |    |
| UNT vs. ACT+6AN        | 0.3716  | -0.1797 to 0.9230 | No         | ns          | 0.1770 | A-C |       |    |
| ACT vs. ACT+6AN        | 1.327   | 0.7759 to 1.879   | Yes        | ***         | 0.0008 | B-C |       |    |
| Test details           | Mean 1  | Mean 2            | Mean Diff. | SE of diff. | n1     | n2  | q     | DF |
| UNT vs. ACT            | 1.710   | 2.665             | -0.9556    | 0.1797      | 3      | 3   | 7.521 | 6  |
| UNT vs. ACT+6AN        | 1.710   | 1.338             | 0.3716     | 0.1797      | 3      | 3   | 2.925 | 6  |
| ACT vs. ACT+6AN        | 2.665   | 1.338             | 1.327      | 0.1797      | 3      | 3   | 10.45 | 6  |
| Compact letter display |         |                   |            |             |        |     |       |    |
| ACT                    | A       |                   |            |             |        |     |       |    |
| UNT                    | B       |                   |            |             |        |     |       |    |
| ACT+6AN                | B       |                   |            |             |        |     |       |    |

**Ordinary one-way ANOVA of Pentose Cycle Activity: Descriptive statistics**

|                    | UNT    | ACT    | ACT+6AN |
|--------------------|--------|--------|---------|
| Number of values   | 3      | 3      | 3       |
| Minimum            | 1.387  | 2.461  | 1.179   |
| 25% Percentile     | 1.387  | 2.461  | 1.179   |
| Median             | 1.809  | 2.743  | 1.306   |
| 75% Percentile     | 1.934  | 2.792  | 1.529   |
| Maximum            | 1.934  | 2.792  | 1.529   |
| Mean               | 1.710  | 2.665  | 1.338   |
| Std. Deviation     | 0.2866 | 0.1783 | 0.1771  |
| Std. Error of Mean | 0.1655 | 0.1030 | 0.1022  |
| Lower 95% CI       | 0.9977 | 2.222  | 0.8982  |
| Upper 95% CI       | 2.422  | 3.108  | 1.778   |

**Supplemental Table 2.** Single cell RNAseq data access and demographics.

| <b>GEO Sample Accession Number</b> | <b>Schafflick ID Code</b> | <b>Disease</b> | <b>Age</b> | <b>Sex</b> |
|------------------------------------|---------------------------|----------------|------------|------------|
| GSM4104122                         | MS19270                   | MS             | 35         | F          |
| GSM4104123                         | MS58637                   | MS             | 22         | M          |
| GSM4104124                         | MS71658                   | MS             | 47         | F          |
| GSM4104125                         | MS49131                   | MS             | 47         | F          |
| GSM4104126                         | MS60249                   | MS             | 28         | F          |
| GSM4104127                         | MS74594                   | MS             | 42         | M          |
| GSM4104128                         | PST83775                  | IIH            | 43         | M          |
| GSM4104129                         | PTC32190                  | IIH            | 33         | M          |
| GSM4104130                         | PST95809                  | IIH            | 43         | F          |
| GSM4104131                         | PTC41540                  | IIH            | 32         | F          |
| GSM4104132                         | PST45044                  | IIH            | 25         | F          |
| GSM4104133                         | PTC85037                  | IIH            | 25         | F          |
